# Supplementary material
Source: publisher figshare collection journal article supplement (https://acs.figshare.com/ndownloader/files/5181898)
Supplement: Supplementary file 1 [file 5181898]

## Supporting Information: Experimental Part

### Nucleophilic Substitution Reactions of Pyranose Polytosylates

Ross P. McGeary, <sup>\*,†,‡</sup> Sara Rasoul Amini, <sup>‡</sup> Vincent W.S. Tang, <sup>‡</sup> and Istvan Toth, <sup>†,‡</sup>

<sup>†</sup>Chemistry Department, School of Molecular and Microbial Sciences, The University of Queensland, Brisbane, Qld 4072, Australia.

<sup>‡</sup>School of Pharmacy, The University of Queensland, Brisbane, Qld 4072, Australia.

r.mcgeary@mailbox.uq.edu.au

#### Table of Contents

| Compound                                                                                                       | Page |
|----------------------------------------------------------------------------------------------------------------|------|
| Methyl $\beta$ -D-Xylopyranoside ( <b>5</b> )                                                                  | S-2  |
| Methyl 2,3,4-Tris-( <i>O</i> -4-toluenesulfonyl)- $\beta$ -D-xylopyranoside ( <b>6</b> )                       | S-3  |
| Methyl 4- <i>O</i> -Benzoyl-2,3-bis-( <i>O</i> -4-toluenesulfonyl)- $\alpha$ -L-arabinopyranoside ( <b>7</b> ) | S-6  |
| Methyl 4-Azido-2,3-Bis-( <i>O</i> -4-toluenesulfonyl)-4-deoxy- $\alpha$ -L-arabinopyranoside ( <b>8</b> )      | S-10 |
| Methyl 2,3-Bis-( <i>O</i> -4-toluenesulfonyl)- $\alpha$ -L-arabinopyranoside ( <b>9</b> )                      | S-13 |
| Methyl 2,3,4-Tris-( <i>O</i> -methanesulfonyl)- $\beta$ -D-xylopyranoside ( <b>10</b> )                        | S-16 |
| Methyl $\beta$ -L-Arabinopyranoside ( <b>12</b> )                                                              | S-16 |
| Methyl 2,3,4-Tris-( <i>O</i> -4-toluenesulfonyl)- $\beta$ -L-arabinopyranoside ( <b>13</b> )                   | S-17 |
| Methyl 4- <i>O</i> -Benzoyl-2,3-bis-( <i>O</i> -4-toluenesulfonyl)- $\alpha$ -D-xylopyranoside ( <b>14</b> )   | S-20 |
| Methyl 4-Azido-2,3-bis-( <i>O</i> -4-toluenesulfonyl)-4-deoxy $\alpha$ -D-xylopyranoside ( <b>15</b> )         | S-24 |
| Methyl 2,3-Bis-( <i>O</i> -4-toluenesulfonyl)- $\alpha$ -D-xylopyranoside ( <b>16</b> )                        | S-27 |

|                                                                                                                     |      |
|---------------------------------------------------------------------------------------------------------------------|------|
| Methyl $\alpha$ -D-Ribopyranoside ( <b>18</b> )                                                                     | S-30 |
| Methyl 2,3,4-Tris-( <i>O</i> -4-toluenesulfonyl)- $\alpha$ -D-ribopyranoside ( <b>19</b> )                          | S-30 |
| Methyl 4-Benzoyl-2,3-bis-( <i>O</i> -4-toluenesulfonyl)- $\beta$ -L-lyxopyranoside ( <b>20</b> )                    | S-34 |
| Methyl 4-Azido-2,3-bis-( <i>O</i> -4-toluenesulfonyl)-4-deoxy- $\beta$ -L-lyxopyranoside ( <b>21</b> )              | S-37 |
| Methyl 2,3-Bis-( <i>O</i> -4-toluenesulfonyl)- $\beta$ -L-lyxopyranoside ( <b>22</b> )                              | S-40 |
| Methyl $\alpha$ -D-Lyxopyranoside ( <b>24</b> )                                                                     | S-43 |
| Methyl 2,3,4-Tris-( <i>O</i> -4-toluenesulfonyl)- $\alpha$ -D-lyxopyranoside ( <b>25</b> )                          | S-43 |
| 3 <i>R</i> ,6 <i>S</i> -3-Benzoyloxy-6-methoxy-4-(4-toluenesulfonyloxy)-3,6-dihydro-2 <i>H</i> -pyran ( <b>26</b> ) | S-47 |

## Experimental Section

**Methyl  $\beta$ -D-Xylopyranoside (5).** A mixture of D-xylose (**4**) (20.0 g, 133 mmol) and ion-exchange resin (Amberlite® IRA-120, 20.0 g) in anhydrous methanol (250 ml) was heated under reflux overnight. The cooled mixture was filtered and evaporated to a mixture of solids and oil. This was taken up in 200 ml hot ethyl acetate. Crystals formed on cooling, and the crystals were allowed to digest for three days before collecting, yielding 10.8 g. Analysis of the product by  $^1\text{H}$  and  $^{13}\text{C}$  NMR spectroscopy showed that it consisted of a 2:1 mixture of  $\beta$ - and  $\alpha$ -anomers. A second recrystallization from ethanol gave the pure  $\beta$ -anomer (**5**), as a white powder (5.74 g, 26%), m.p. 154.5-155.5 °C (lit. m.p.<sup>1</sup> 156-157 °C).  $R_f$  (3:2:1  $\text{CHCl}_3/\text{EtOAc}/\text{MeOH}$ ): 0.23.  $[\alpha]_D -65.6$  ( $c$  0.7,  $\text{H}_2\text{O}$ ) (lit.<sup>2</sup>  $[\alpha]_D -65.3$  ( $c$  1.0,  $\text{H}_2\text{O}$ )).  $^1\text{H}$  NMR (500 MHz,  $(\text{CD}_3)_2\text{SO}$ ) 2.89-2.96 (m, 1H, H2); 3.03 (t, 1H,  $J = 10.8$  Hz, H5a); 3.06-3.11 (m, 1H, H4); 3.24-3.29 (m, 1H, H3); 3.35 (s, 3H, OMe); 3.70 (dd, 1H,  $J = 5.3, 11.2$  Hz, H5e); 4.00 (d, 1H,  $J = 7.6$  Hz, H1); 4.89 (d, 1H,  $J$

= 4.8 Hz, OH); 4.91 (d, 1H,  $J$  = 5.1 Hz, OH); 5.00 (d, 1H,  $J$  = 4.9 Hz, OH).  $^{13}\text{C}$  NMR (125 MHz,  $(\text{CD}_3)_2\text{SO}$ ) 56.5, 66.2, 70.2, 73.8, 77.1, 105.3.

**Methyl 2,3,4-Tris-(*O*-4-toluenesulfonyl)- $\beta$ -D-xylopyranoside (6).** Methyl  $\beta$ -D-xylopyranoside (**5**) (500 mg, 3.05 mmol) was added to a stirred, chilled (0 °C) solution of 4-toluenesulfonyl chloride (2.32 g, 12.2 mmol) in pyridine (10 ml). After standing for 7 days, the mixture was poured onto ice water (50 ml). The product separated as a sticky mass. The mixture was extracted into  $\text{CH}_2\text{Cl}_2$  (3x50 ml) and the combined extracts were washed with 5% HCl (3x100 ml), saturated  $\text{NaHCO}_3$  (100 ml) and brine (50 ml), then dried ( $\text{MgSO}_4$ ) and evaporated to a colorless foam. The product was dissolved in a little methanol and slow evaporation of the solvent yielded the tritosylate (**6**) as colorless crystals (1.90 g, 99%), m.p. 137.5-138.5 °C (lit.<sup>3</sup> m.p. 140-141 °C).  $R_f$  (1:1 EtOAc/hexane): 0.34.  $[\alpha]_D$  -32.2 ( $c$  1.0,  $\text{CHCl}_3$ ) (lit.<sup>4</sup>  $[\alpha]_D$  -33.7 ( $c$  1.0,  $\text{CHCl}_3$ )). ES-MS: 627 ( $\text{MH}$ )<sup>+</sup>, 644 ( $\text{M}+\text{NH}_4$ )<sup>+</sup>, 649 ( $\text{M}+\text{Na}$ )<sup>+</sup>.  $^1\text{H}$  NMR (500 MHz,  $\text{CDCl}_3$ ) 2.44 (s, 3H, Me); 2.45 (s, 3H, Me); 2.46 (s, 3H, Me); 3.14 (s, 3H, OMe); 3.48 (ddd, 1H,  $J$  = 0.8, 4.6, 12.9 Hz, H5e); 4.06 (dd, 1H,  $J$  = 3.1, 12.9 Hz, H5a); 4.30 (ddd, 1H,  $J$  = 0.5, 3.4, 4.9 Hz, H2); 4.36 (dt, 1H,  $J$  = 3.3, 4.8, H4); 4.39 (d, 1H,  $J$  = 3.3 Hz, H1); 4.71 (t, 1H,  $J$  = 5.0, H3); 7.31-7.36 (m, 6H, Ar-H); 7.70-7.75 (m, 6H, Ar-H).  $^{13}\text{C}$  NMR (125 MHz,  $\text{CDCl}_3$ ) 21.5, 21.6, 21.7, 56.0, 58.8, 72.2, 73.0, 73.6, 99.0, 128.0, 128.1, 128.3, 129.7, 129.8., 129.9, 132.4, 132.6, 133.3, 145.0, 145.3, 145.4. HRMS (TOF) calcd for  $\text{C}_{27}\text{H}_{31}\text{O}_{11}\text{S}_3$  ( $\text{M}+\text{H}$ )<sup>+</sup> 627.1029, found 627.1043.

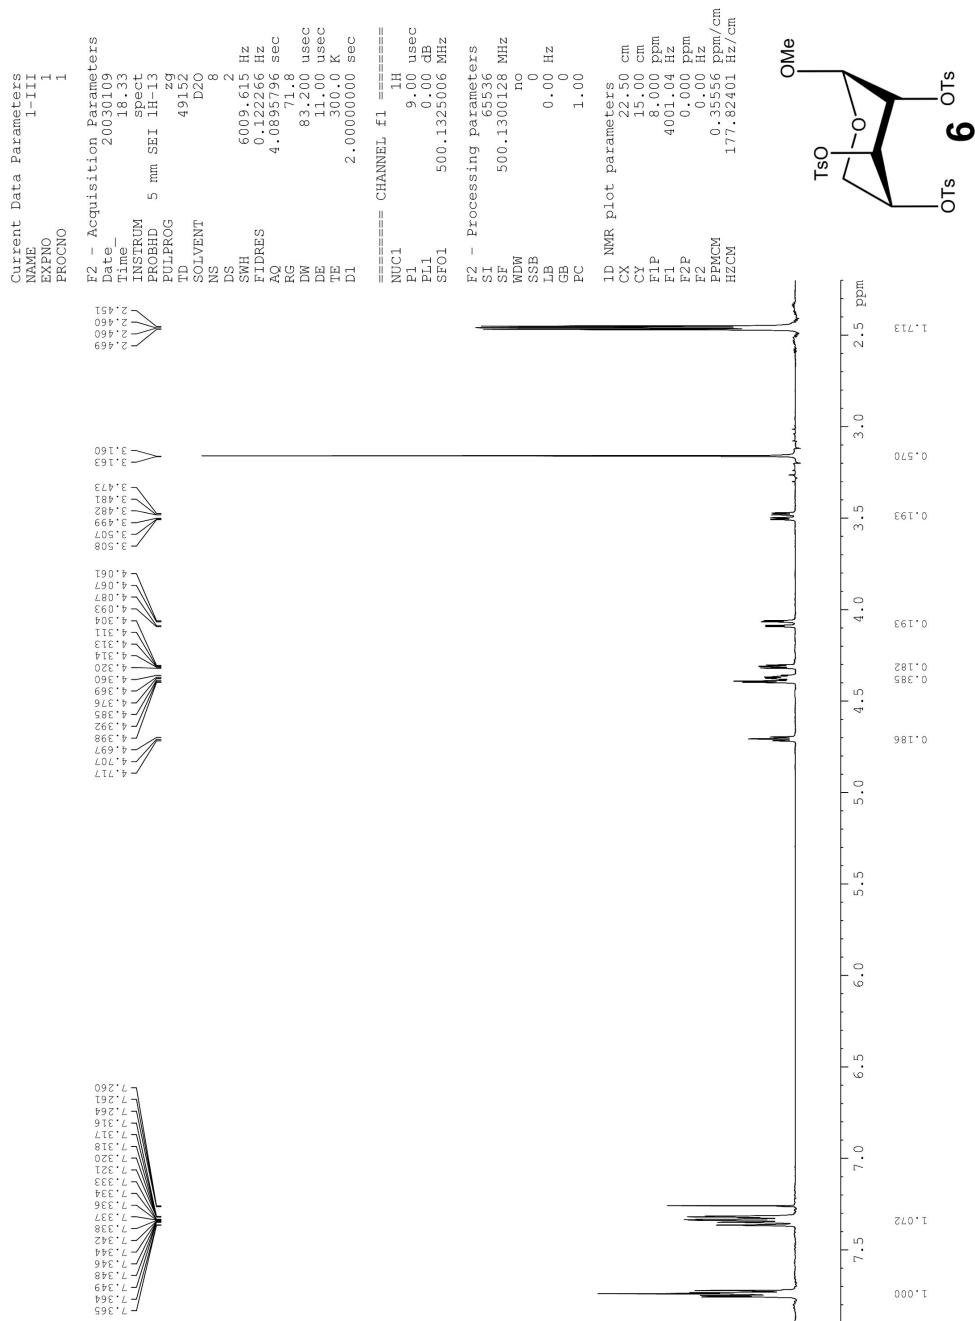



Current Data Parameters  
NAME 1-III  
EXPNO 2  
PROCNO 1

F2 - Acquisition Parameters  
Date\_ 20030109  
Time 18.38  
INSTRUM spect  
PROBHD 5 mm SEI 1H-13  
PULPROG zgpg  
TD 65536  
SOLVENT D2O  
NS 6144  
DS 4  
SWH 27777.777 Hz  
FIDRES 0.423855 Hz  
AQ 1.1797160 sec  
RG 16384  
DW 18.000 usec  
DE 11.00 usec  
TE 300.0 K  
D1 2.0000000 sec  
d11 0.0300000 sec  
d12 0.0002000 sec

===== CHANNEL f1 =====  
NUC1 13C  
P1 5.00 usec  
PL1 -2.10 dB  
SFO1 125.7703648 MHz

===== CHANNEL f2 =====  
CPDPRG2 waltz16  
NUC2 1H  
PCPD2 100.00 usec  
PL2 -3.00 dB  
PL12 21.00 dB  
PL13 27.00 dB  
SFO2 500.1325006 MHz

F2 - Processing parameters  
SI 32768  
SF 125.7577610 MHz  
WDW EM  
SSB 0  
LB 2.00 Hz  
GB 0  
PC 1.00

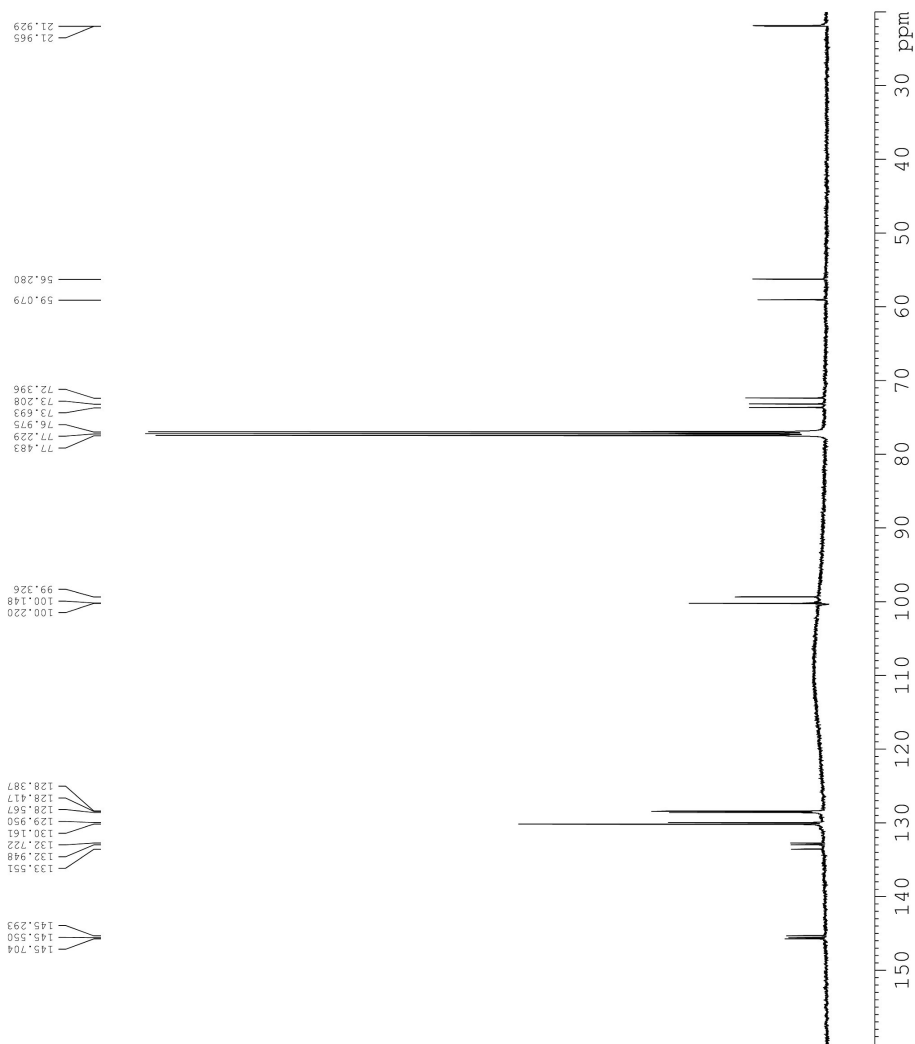

**Methyl 4-*O*-Benzoyl-2,3-bis-(*O*-4-toluenesulfonyl)- $\alpha$ -L-arabino pyranoside (7).**

(1) From (6): The tritosylate (6) (250 mg, 0.399 mmol) and sodium benzoate (510 mg, 3.54 mmol) were suspended in dry DMF (15 ml) and heated for 20 h at 130 °C. The cooled mixture was evaporated, and then the residue was extracted with EtOAc (50 ml). The filtered extract was washed with 5% HCl (2x50 ml), saturated NaHCO<sub>3</sub> (2x50 ml) and brine (50 ml), then dried (MgSO<sub>4</sub>) and evaporated to a crystalline solid. This was triturated with cold hexane to give the monobenzoate (7) as colorless crystals (140 mg, 61%), m.p. 79-81 °C.  $[\alpha]_D$  -1.4 (c 0.3, CHCl<sub>3</sub>). ES-MS: 577 (MH)<sup>+</sup>, 594 (M+NH<sub>4</sub>)<sup>+</sup>, 599 (M+Na)<sup>+</sup>. <sup>1</sup>H NMR (500 MHz, CDCl<sub>3</sub>) 2.25 (s, 3H, Me); 2.42 (s, 3H, Me); 3.27 (s, 3H, OMe); 3.58 (ddd, 1H, *J* = 0.5, 3.1, 11.6 Hz, H5a); 4.08 (dd, 1H, *J* = 7.0, 11.2 Hz, H5b); 4.40 (d, 1H, *J* = 4.1 Hz, H1); 4.73 (dd, 1H, *J* = 3.4, 6.4 Hz, H3); 4.78 (dd, 1H, *J* = 4.1, 6.5 Hz, H2); 5.28 (dt, 1H, *J* = 3.4, 6.9 Hz, H4); 7.03 (br d, 2H, *J* = 11.2 Hz, Ar-H); 7.33 (br d, 2H, *J* = 9.3 Hz, Ar-H); 7.38 (br t, 2H, *J* = 7.9 Hz, Ar-H); 7.54 (t, 1H, *J* = 7.5 Hz, Ar-H); 7.57 (d, 2H, *J* = 8.3, Ar-H); 7.80-7.84 (m, 2H, Ar-H). <sup>13</sup>C NMR (125 MHz, CDCl<sub>3</sub>) 21.7, 21.8, 56.5, 60.4, 66.8, 74.5, 75.4, 100.1, 128.3, 128.4, 128.5, 128.6, 129.1, 129.2, 129.9, 132.8, 133.5, 133.6, 145.1, 145.2, 165.0. HRMS (TOF) calcd for C<sub>27</sub>H<sub>29</sub>O<sub>10</sub>S<sub>2</sub> (M+H)<sup>+</sup> 577.1202, found 577.1208.

(2) From (9): A solution of the ditosylate (9) (7.0 mg, 0.015 mmol) in pyridine (3 ml) was treated with benzoyl chloride (0.15 ml, 0.18 g, 1.3 mmol). After stirring overnight at room temperature, the solution was evaporated and the residue was dissolved in EtOAc (10 ml). This solution was washed with 5% HCl (3x10 ml), saturated NaHCO<sub>3</sub>

(2x10ml) and brine (10 ml), then dried ( $\text{MgSO}_4$ ) and evaporated to give the benzoate (**7**) (8.5 mg, 100%), identical by NMR and TLC to the sample prepared from (**6**) (above).

Current Data Parameters  
NAME 23-1  
EXPNO 1  
PROCNO 1

F2 - Acquisition Parameters  
Date\_ 20030117  
Time 9.49  
INSTRUM spect  
PROBHD 5 mm SEI 1H-13  
PULPROG zg  
TD 49152  
SOLVENT CDCl3  
NS 8  
DS 2  
SWH 6009.615 Hz  
FIDRES 0.122266 Hz  
AQ 4.0895796 sec  
RG 12.7  
DW 83.200 usec  
DE 11.00 usec  
TE 300.0 K  
D1 2.00000000 sec

CHANNEL f1  
NUC1 1H  
P1 9.00 usec  
PL1 0.00 dB  
SFO1 500.1325006 MHz

F2 - Processing parameters  
SI 65536  
SF 500.1300229 MHz  
WDW no  
SSB 0  
LB 0.00 Hz  
GB 0  
PC 1.00

1D NMR plot parameters  
CX 22.50 cm  
CT 10.08 cm  
F1P 7.08 ppm  
F2P 3951.903 ppm  
F2 2.200 ppm  
F2 1100.29 Hz  
PPMCM 0.25333 ppm/cm  
HZCM 126.69961 Hz/cm

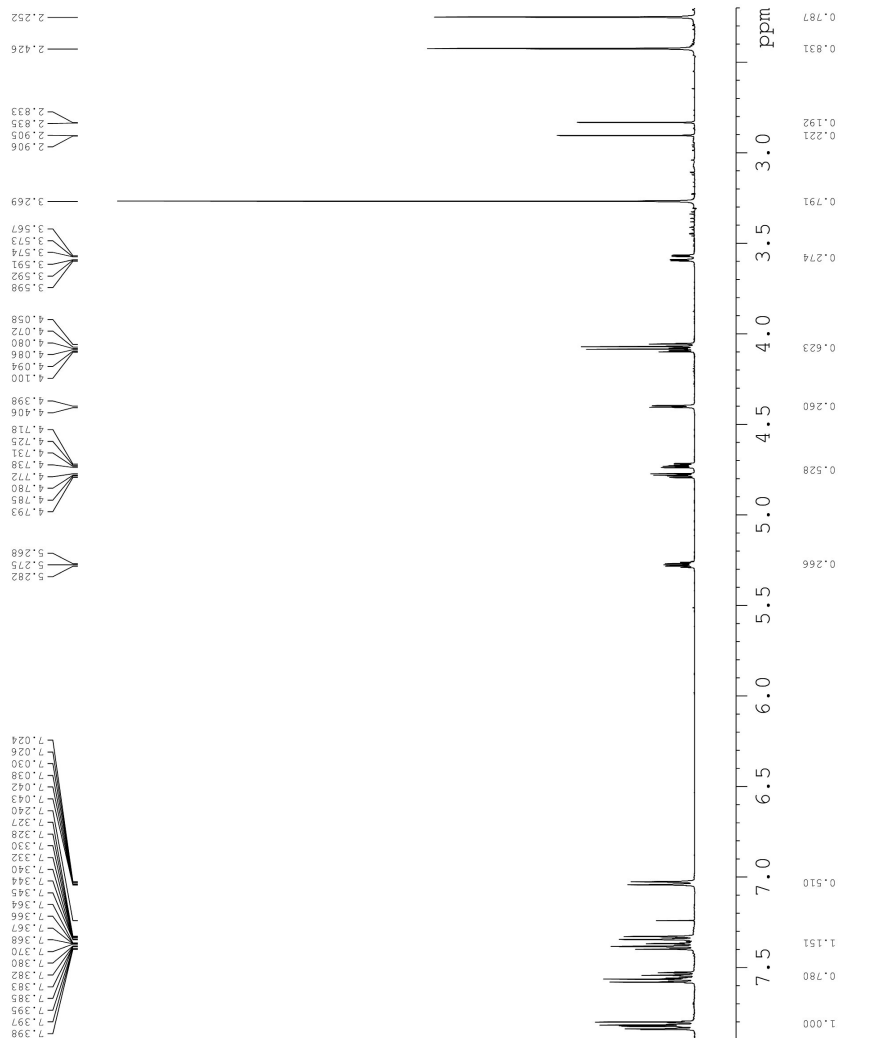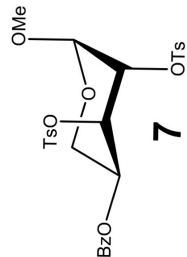

Current Data Parameters  
NAME 23-1  
EXPNO 12  
PROCNO 1

F2 - Acquisition Parameters  
Date\_ 20030709  
Time 10.40  
INSTRUM spect  
PROBHD 5 mm SEI IH-13  
PULPROG zgpg30  
TD 65536  
SOLVENT D2O  
NS 1024  
DS 4  
SWH 27777.777 Hz  
FIDRES 0.423855 Hz  
AQ 1.1797160 sec  
RG 16384  
DW 18.000 usec  
DE 11.00 usec  
TE 305.0 K  
D1 2.0000000 sec  
d11 0.3000000 sec  
MCREST 0.0000000 sec  
MCWRK 0.01500000 sec

===== CHANNEL f1 =====  
NUC1 13C  
P1 5.50 usec  
PL1 -2.10 dB  
SF01 125.7703648 MHz

===== CHANNEL f2 =====  
CPDPRG2 waltz16  
NUC2 1H  
PCPD2 100.00 usec  
PL2 21.00 dB  
PL12 21.00 dB  
PL13 27.00 dB  
SF02 500.1325006 MHz

F2 - Processing parameters  
SI 65536  
SF 125.7577563 MHz  
WDW EM  
SSB 0  
LB 1.00 Hz  
GB 0  
PC 1.00

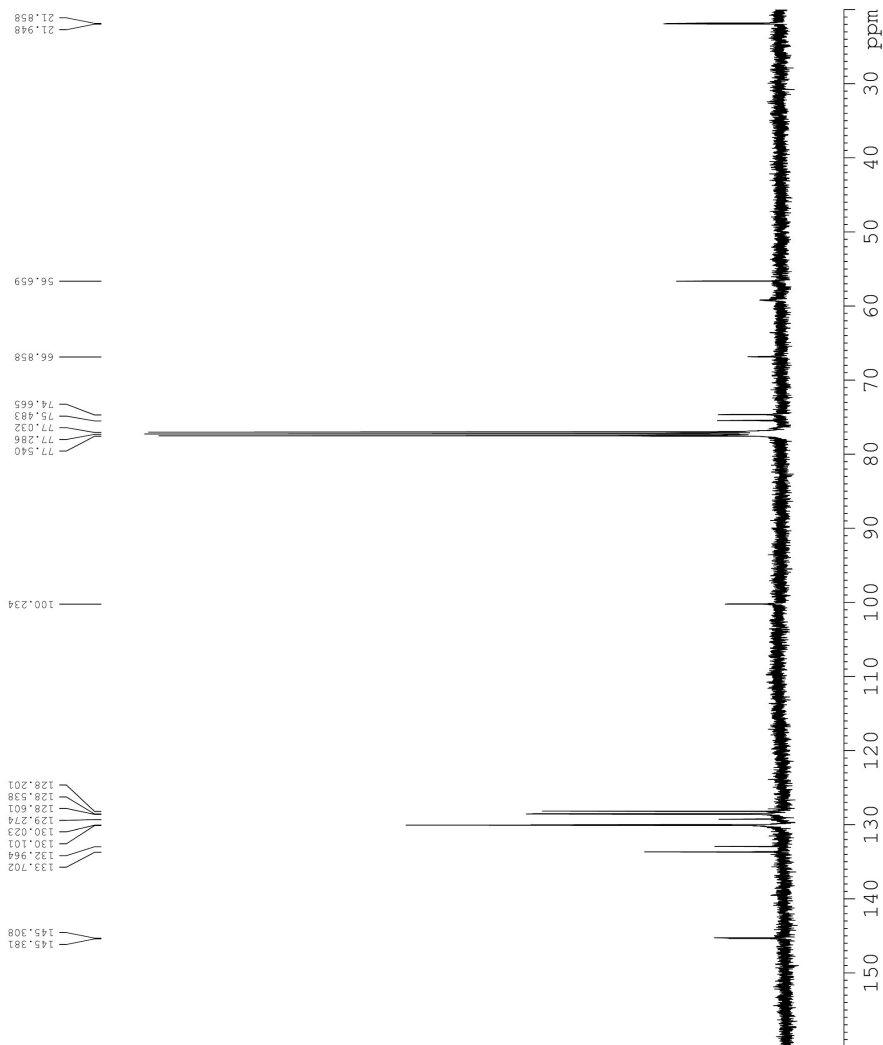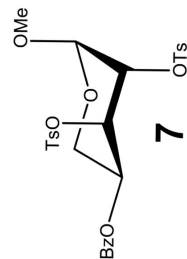

**Methyl 4-Azido-2,3-Bis-(*O*-4-toluenesulfonyl)-4-deoxy- $\alpha$ -L-arabino pyranoside (8).**

The tritosylate (**6**) (50 mg, 80  $\mu$ mol) and sodium azide (27 mg, 0.41 mmol) were suspended in dry DMF (5 ml) and heated for 20 h at 130 °C. The cooled mixture was evaporated, and then the residue was extracted with EtOAc (50 ml). The filtered extract was washed with 5% HCl (2x50 ml), saturated NaHCO<sub>3</sub> (2x50 ml) and brine (50 ml), then dried (MgSO<sub>4</sub>) and evaporated to a yellow crystalline solid. This was recrystallized from EtOAc/hexane to give the azido derivative (**8**) as colorless crystals (45 mg, 98%), m.p. 176-178 °C (softening at 165 °C).  $[\alpha]_D$  -11.8 (c 0.2, CHCl<sub>3</sub>). ES-MS: 498 (MH)<sup>+</sup>, 515 (M+NH<sub>4</sub>)<sup>+</sup>, 520 (M+Na)<sup>+</sup>. <sup>1</sup>H NMR (500 MHz, CDCl<sub>3</sub>) 2.42 (s, 3H, Me); 2.45 (s, 3H, Me); 3.17 (s, 3H, OMe); 3.53 (dd, 1H, *J* = 2.7, 11.7 Hz, H5e); 3.93 (dd, 1H, *J* = 6.3, 11.6 Hz, H5a); 3.96-3.99 (m, 1H, H4); 4.26 (d, 1H, *J* = 4.4 Hz, H1); 4.64 (dd, 1H, *J* = 3.1, 6.7 Hz, H3); 4.66 (dd, 1H, *J* = 4.3, 6.8 Hz, H2); 7.32-7.36 (m, 4H, Ar-H); 7.78 (br d, 2H, *J* 8.6 Hz, Ar-H); 7.81 (br d, 2H, *J* = 8.5 Hz, Ar-H). <sup>13</sup>C NMR (125 MHz, CDCl<sub>3</sub>) 22.1, 22.2, 56.8, 57.1, 60.3, 75.5, 75.7, 100.1, 128.7, 128.9, 130.2, 130.4, 132.7, 133.9, 145.6, 146.1. HRMS (TOF) calcd for C<sub>20</sub>H<sub>24</sub>N<sub>3</sub>O<sub>8</sub>S<sub>2</sub> (M+H)<sup>+</sup> 498.1005, found 498.1002.

Current Data Parameters  
NAME 26-2  
EXPNO 1  
PROCNO 1

F2 - Acquisition Parameters  
Date\_ 20030122  
Time 14:18  
INSTRUM spect  
PROBHD 5 mm SEI 1H-13  
PULPROG zg  
TD 49152  
SOLVENT CDCl3  
NS 8  
DS 2  
SWH 6009.615 Hz  
AQ 0.122266 Hz  
RG 4.0895796 sec  
DE 64  
TE 83.200 usec  
TE 11.00 usec  
TE 300.0 K  
D1 2.00000000 sec

===== CHANNEL f1 =====  
NUC1 1H  
P1 9.00 usec  
PL1 0.00 dB  
SFO1 500.1325006 MHz

F2 - Processing parameters  
SI 65536  
SF 500.130012 MHz  
WDW no  
SSB 0  
LB 0.00 Hz  
GB 0  
PC 1.00

1D NMR plot parameters  
CX 22.50 cm  
CY 10.01 cm  
F1P 7.900 ppm  
F1 3951.03 Hz  
F2P 12.200 ppm  
F2 1100.29 Hz  
FREQM 0.25353 ppm/cm  
HZCM 126.69960 Hz/cm

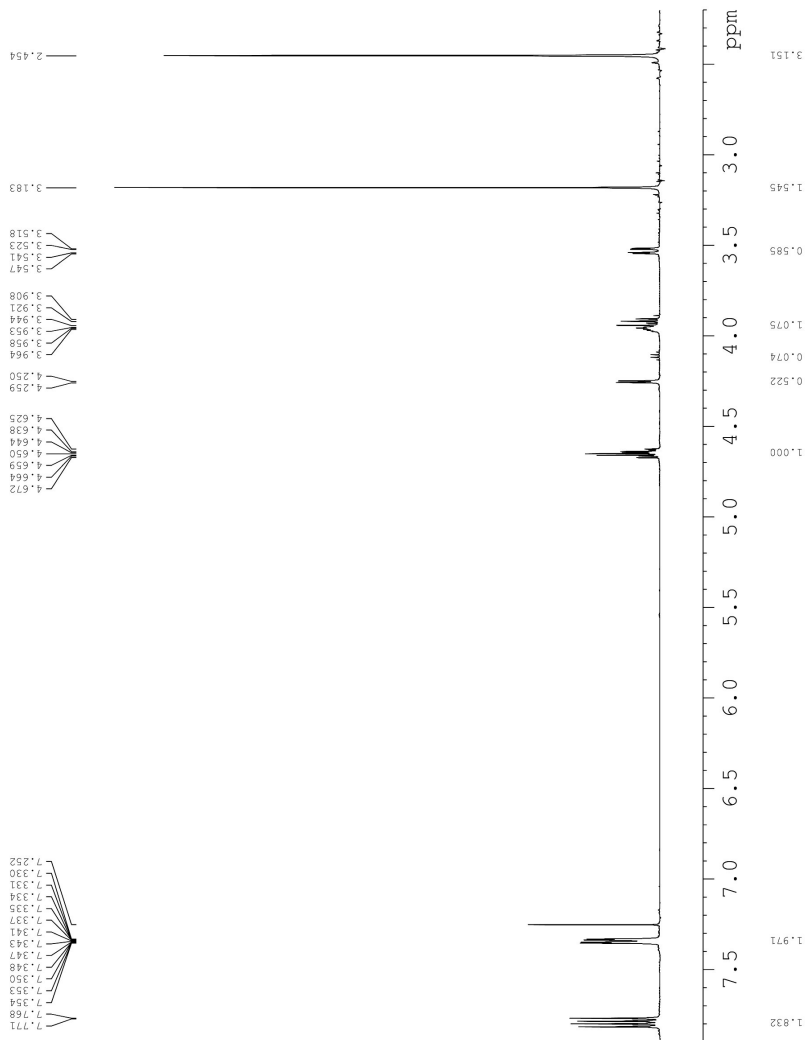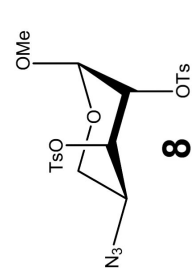

Current Data Parameters  
NAME II-33-1  
EXNO 4  
PROCNO 1

F2 - Acquisition Parameters  
Date\_ 20030627  
Time\_ 13:55  
INSTRUM spect  
PROBHD 5 mm SEI 1H-13  
PULPROG zgpg  
TD 65536  
SOLVENT D2O  
NS 1024  
DS 4  
SWH 27777.777 Hz  
FIDRES 0.423855 Hz  
AQ 1.1797160 sec  
RG 16384  
DW 11.000 usec  
DE 11.00 usec  
TE 305.1 K  
D1 2.00000000 sec  
d11 0.03000000 sec  
MCREST 0.00000000 sec  
MCWRK 0.01500000 sec

===== CHANNEL f1 =====  
NUC1 13C  
P1 5.50 usec  
PL1 -2.10 dB  
SFO1 125.7703648 MHz  
===== CHANNEL f2 =====  
CPDPRG2 wait216  
NUC2 1H  
PCPD2 100.00 usec  
PL2 -3.00 dB  
PL12 21.00 dB  
PL13 27.00 dB  
SFO2 500.1325006 MHz

F2 - Processing parameters  
SI 65536  
SF 125.7577283 MHz  
WDW EM  
SSB 0  
LB 1.00 Hz  
GB 0  
PC 1.00

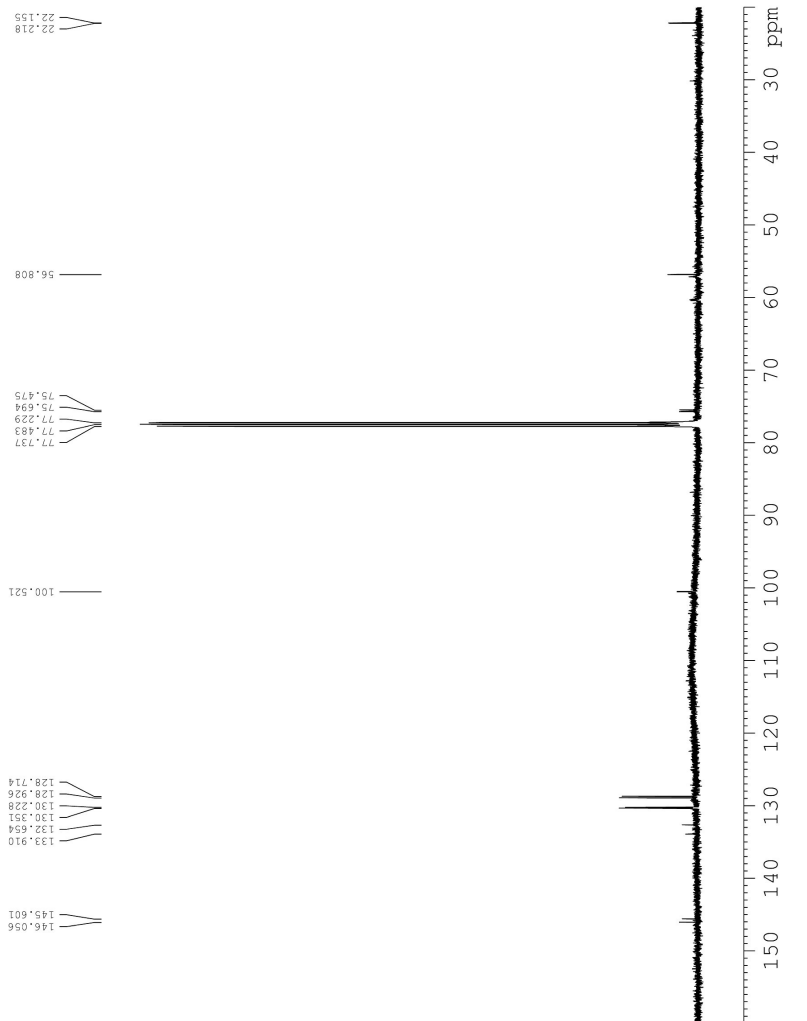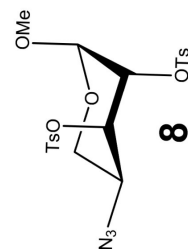



**Methyl 2,3-Bis-(*O*-4-toluenesulfonyl)- $\alpha$ -L-arabino pyranoside (9).** The tritosylate (**6**) (100 mg, 0.16 mmol) and sodium nitrite (100 mg, 1.45 mmol) were suspended in dry DMF (5 ml) and heated at 130 °C for 72 h. The cooled mixture was evaporated, and the residue was extracted with EtOAc (20 ml). The organic extract was washed with 5% HCl (2x20 ml), then saturated NaHCO<sub>3</sub> (2x20 ml) and brine (15 ml), then dried (MgSO<sub>4</sub>) and evaporated to a colorless foam. This was purified by column chromatography (eluent: EtOAc/CHCl<sub>3</sub>/hexane 3:2:1) to give the ditosylate (**9**) as colorless crystals (42 mg, 56%), m.p. 122-123 °C.  $[\alpha]_D -2.9$  (*c* 0.5, CHCl<sub>3</sub>). ES-MS: 473 (MH)<sup>+</sup>, 490 (M+NH<sub>4</sub>)<sup>+</sup>, 495 (M+Na)<sup>+</sup>. *R*<sub>f</sub> (3:2:1 EtOAc/CHCl<sub>3</sub>/hexane): 0.18. <sup>1</sup>H NMR (500 MHz, CDCl<sub>3</sub>) 2.43 (s, 3H, Me); 2.44 (s, 3H, Me); 3.14 (s, 3H, OMe); 3.49 (dd, 1H, *J* = 2.6, 12.5 Hz, H5a); 3.89 (dd, 1H, *J* = 5.1, 12.4 Hz, H5b); 4.13-4.18 (m, 1H, H4); 4.19 (d, 1H, *J* = 5.3 Hz, H1); 4.57 (dd, 1H, *J* = 3.3, 7.5 Hz, H3); 4.67 (dd, 1H, *J* = 5.3, 7.4 Hz, H2); 7.30 (br d, 2H, *J* = 8.0 Hz, Ar-H); 7.34 (br d, 2H, *J* = 8.0 Hz, Ar-H); 7.72 (br d, 2H, *J* = 8.3 Hz, Ar-H); 7.80 (br d, 2H, *J* = 8.2, Ar-H); OH not observed. <sup>13</sup>C NMR (125 MHz, CDCl<sub>3</sub>) 22.1, 22.2, 56.8, 63.2, 66.5, 76.4, 78.3, 101.0, 128.7, 128.8, 130.1, 130.4, 133.0, 134.7, 145.3, 146.0. HRMS (TOF) calcd for C<sub>20</sub>H<sub>25</sub>O<sub>9</sub>S<sub>2</sub> (M+H)<sup>+</sup> 473.0940, found 473.0950.

```

Current Data Parameters
NAME      11-23-cc-frc2
EXPNO     1
PROCNO    1

F2 - Acquisition Parameters
Date_     20030617
Time      14.53
INSTRUM   spect
PROBHD    5 mm SEI 1H-13
PULPROG   zg
TD         49152
SOLVENT   CDCl3
NS         8
DS         2
SWH        6009.615 Hz
FIDRES     0.122266 Hz
AQ         4.0835796 sec
RG         1024
AQ         81.206 usec
DE         11.00 usec
TE         305.0 K
D1         2.00000000 sec
MCREST    0.00000000 sec
MCWRK     0.01500000 sec

===== CHANNEL f1 =====
NUC1       1H
P1         9.00 usec
PL1        0.00 dB
SFO1       500.1325006 MHz

F2 - Processing parameters
SI         65536
SF         500.1300207 MHz
WDW        no
SSB        0
LB         0.00 Hz
GB         0
PC         1.00

1D NMR plot parameters
CX         22.50 cm
CY         15.00 cm
F1P        8.000 ppm
F1         4001.04 Hz
F2         2.0209 ppm
F2         112.29 Hz
F2MCM      0.95778 ppm/cm
HZCM       128.92241 Hz/cm

```

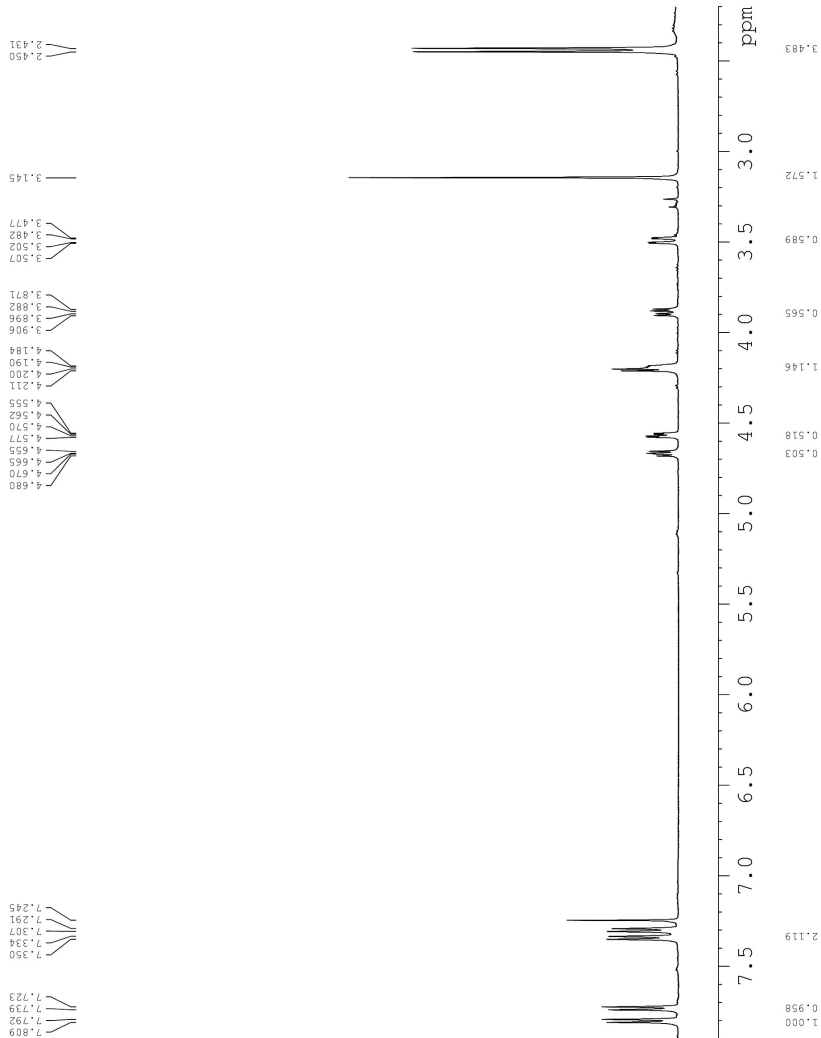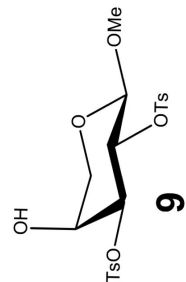

```

Current Data Parameters
NAME      II-23-cc-irc2
EXPNO     3
PROCNO    1

F2 - Acquisition Parameters
Date_     20030617
Time      15.58
INSTRUM   spect
PROBHD    5 mm SEI 1H-13
PULPROG   zgpg
TD         65536
SOLVENT   D2O
NS         1024
DS         4
SWH        27777.777 Hz
FIDRES     0.423855 Hz
AQ         1.1797160 sec
RG         18384
DM         18384
DE         11.00 usec
TE         305.0 K
D1         2.00000000 sec
d11        0.03000000 sec
MCREST    0.00000000 sec
MCWRK     0.01500000 sec

===== CHANNEL f1 =====
NUC1       13C
P1         5.50 usec
PL1        -2.10 dB
SFO1      125.7703648 MHz

===== CHANNEL f2 =====
CPDPRG2    waltz16
NUC2       1H
PCPD2      100.00 usec
PL2        -3.00 dB
PL12       21.00 dB
PL13       27.00 dB
SFO2      500.1325006 MHz

F2 - Processing parameters
SI         65536
SF         125.7576995 MHz
WDW        EM
SSB        0
GB         0
PC         1.00
  
```

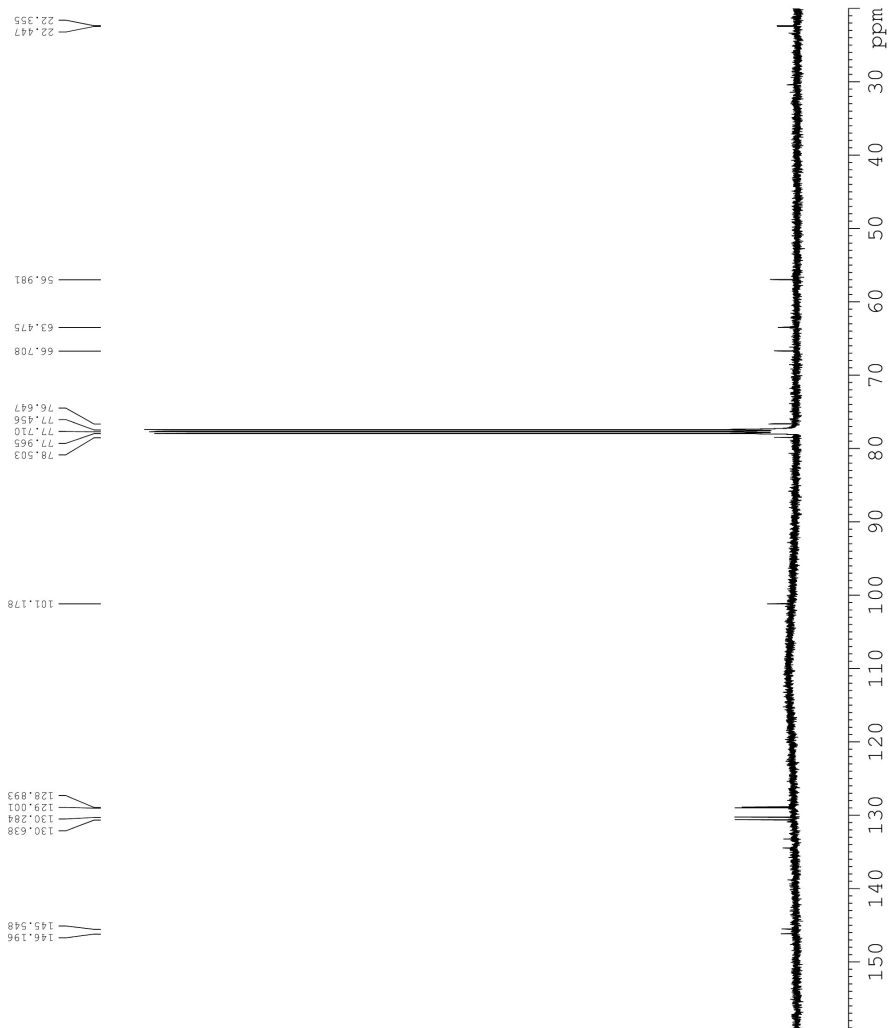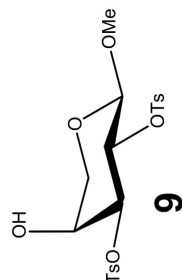

**Methyl 2,3,4-Tris-(*O*-methanesulfonyl)- $\beta$ -D-xylopyranoside (10).** Methyl  $\beta$ -D-xylopyranoside (**5**) (500 mg, 3.05 mmol) was added to a stirred, chilled (0 °C) solution of methanesulfonyl chloride (0.95 ml, 1.40 g, 12.2 mmol) in pyridine (10 ml). After standing for 7 d, the dark crystalline mass was poured onto ice (50 ml). After the ice had melted, the dark mixture was shaken with CH<sub>2</sub>Cl<sub>2</sub> (3x50 ml) and filtered through a layer of Celite. The organic phase was washed with 5% HCl (3x50 ml), saturated NaHCO<sub>3</sub> (100 ml) and brine (50 ml), then dried (MgSO<sub>4</sub>) and evaporated to a yellow foam. The product was dissolved in a little methanol and slow evaporation of the solvent yielded tan crystals of the trimesylate (**10**) (1.19 g, 98%), m.p. 137.5-138.5 °C (lit.<sup>5</sup> m.p. 147.5-148.5).  $[\alpha]_D$  -33.0 (*c* 0.3, CHCl<sub>3</sub>) (lit.<sup>5</sup>  $[\alpha]_D$  -33.6 (*c* 1.4, CHCl<sub>3</sub>)). *R*<sub>f</sub> (EtOAc): 0.57. <sup>1</sup>H NMR (500 MHz, CDCl<sub>3</sub>) 3.15 (s, 3H, Me); 3.16 (s, 3H, Me); 3.22 (s, 3H, Me); 3.49 (dd, 1H, *J* = 10.1, 12.0 Hz, H5a); 3.55 (s, 3H, OMe); 4.32 (dd, 1H, *J* = 5.7, 12.0 Hz, H5b); 4.40 (d, 1H, *J* = 7.6 Hz, H1); 4.49 (dd, 1H, *J* = 7.6, 9.4 Hz, H2); 4.65 (ddd, 1H, *J* = 5.7, 9.1, 10.1 Hz, H4); 4.85 (t, 1H, *J* = 9.3, H3). <sup>13</sup>C NMR (125 MHz, CDCl<sub>3</sub>) 38.4, 39.3, 39.6, 57.1, 63.3, 74.0, 77.6, 78.3, 101.4.

**Methyl  $\beta$ -L-Arabinopyranoside (12).** A mixture of L-arabinose (**11**) (11.0 g, 73.3 mmol) and ion-exchange resin (Amberlite® IRA-120, 20.0 g) in anhydrous methanol (150 ml) was heated under reflux overnight. The cooled mixture was filtered and evaporated to a cream solid. This was recrystallized from ethanol to give the pure  $\beta$ -anomer (**12**) as colorless crystals (4.40 g, 37%), m.p. 166.5-168.5 °C (lit.<sup>6</sup> m.p. 167-169 °C).  $[\alpha]_D$  240 (*c* 0.6, H<sub>2</sub>O) (lit.<sup>7</sup>  $[\alpha]_D$  243 (*c* 0.6, H<sub>2</sub>O)). <sup>1</sup>H NMR (500 MHz, (CD<sub>3</sub>)<sub>2</sub>SO)) 3.30 (s, 3H, OMe); 3.44 (dd, 1H, *J* = 2.9, 11.9 Hz, H5); 3.52-3.62 (m, 3H, H2,3,5); 3.69

(m, 1H, H4); 4.45 (d, 1H,  $J = 3.5$  Hz, H1); 4.49-4.54 (m, 3H, 3xOH).  $^{13}\text{C}$  NMR (125 MHz,  $(\text{CD}_3)_2\text{SO}$ ) 54.8, 62.9, 68.2, 68.6, 69.1, 100.6.

**Methyl 2,3,4-Tris-(*O*-4-toluenesulfonyl)- $\beta$ -L-arabinopyranoside (13).** Methyl  $\beta$ -L-arabinopyranoside (**12**) (1.33 g, 8.10 mmol) was added portionwise to a chilled (0 °C) solution of 4-toluenesulfonyl chloride (6.18 g, 32.4 mmol) in pyridine (20 ml). After standing for 7 days at room temperature, the solution was poured into 100 ml of ice water, and the product separated as a sticky mass. The mixture was extracted with  $\text{CHCl}_3$ , (3x100 ml) and the combined extracts were washed with 5% HCl (2x50 ml), water (50 ml) and brine (50 ml), then dried ( $\text{MgSO}_4$ ) and evaporated to a colorless foam (4.95 g). This was recrystallized twice from ethanol to give the tritosylate (**13**) as colorless crystals (3.46 g, 68%), m.p. 112-113 °C (lit.<sup>3</sup> m.p. 116-117 °C).  $[\alpha]_{\text{D}}^{25} 97.7$  ( $c$  0.9,  $\text{CHCl}_3$ ) (lit.<sup>8</sup>  $[\alpha]_{\text{D}}^{25} 101$  ( $c$  0.9,  $\text{CHCl}_3$ )). ES-MS: 627 ( $\text{MH}$ )<sup>+</sup>, 644 ( $\text{M}+\text{NH}_4$ )<sup>+</sup>, 649 ( $\text{M}+\text{Na}$ )<sup>+</sup>.  $^1\text{H}$  NMR (500 MHz,  $\text{CDCl}_3$ ): 2.43 (s, 3H, Me); 2.44 (s, 3H, Me); 2.46 (s, 3H, Me); 3.25 (s, 3H, OMe); 3.75 (dd, 1H,  $J = 0.7, 13.3$  Hz, H5a); 3.85 (dd, 1H,  $J = 2.3, 13.3$  Hz, H5b); 4.64 (dd, 1H,  $J = 3.4, 10.2$  Hz, H2); 4.75 (dd, 1H,  $J = 3.3, 10.1$  Hz, H3); 4.77 (d, 1H,  $J = 3.4$  Hz, H1); 4.98 (m, 1H, H4); 7.26 (br d, 2H,  $J = 8.2$  Hz, Ar-H); 7.28 (br d, 2H,  $J = 8.3$  Hz, Ar-H); 7.34 (br d, 2H,  $J = 8.3$  Hz, Ar-H); 7.62 (br d, 2H,  $J = 8.3$  Hz, Ar-H); 7.64 (br d, 2H,  $J = 8.3$  Hz, Ar-H); 7.78 (br d, 2H,  $J = 8.2$  Hz, Ar-H).  $^{13}\text{C}$  NMR (125 MHz,  $\text{CDCl}_3$ ) 21.7, 21.8, 21.8, 56.0, 60.3, 72.1, 73.3, 97.9, 128.1, 128.2, 128.3, 129.8, 129.9, 130.1, 132.5, 133.2, 133.3, 145.1, 145.2, 145.3.

Current Data Parameters  
NAME RM-V 38  
EXNO 1  
PROCNO 1

F2 - Acquisition Parameters  
Date\_ 20030612  
Time\_ 18:25  
INSTRUM spect  
PROBHD 5 mm SEI 1H-13  
PULPROG zg  
TD 49152  
SOLVENT CDCl3  
NS 8  
DS 2  
SWH 6009.615 Hz  
FIDRES 0.122266 Hz  
AQ 4.0895796 sec  
RG 226  
RG 83.206 usec  
DE 11.00 usec  
TE 305.0 K  
D1 2.00000000 sec  
MCREST 0.00000000 sec  
MCWRK 0.01500000 sec

===== CHANNEL f1 =====  
NUC1 1H  
P1 9.00 usec  
PL1 0.00 dB  
SFO1 500.1325006 MHz

F2 - Processing parameters  
SI 65536  
SF 500.1300234 MHz  
WDW no  
SSB 0  
LB 0.00 Hz  
GB 0  
PC 1.00

1D NMR plot parameters  
CX 22.50 cm  
CY 15.00 cm  
F1P 7.873 ppm  
F1 3937.76 Hz  
F2P 3.477 ppm  
F2 1739.79 Hz  
PWCN 0.19532 ppm/cm  
HZCN 97.68743 Hz/cm

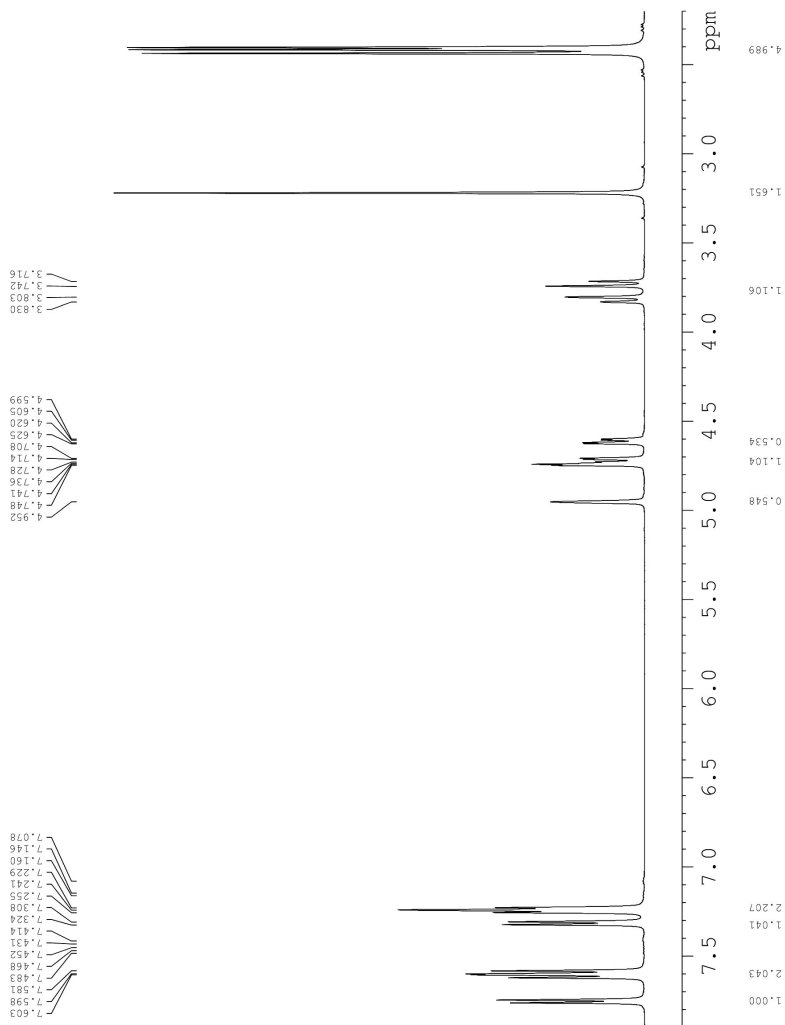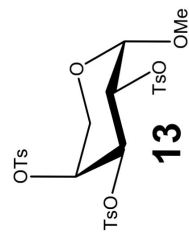

Current Data Parameters  
NAME fm-v-83a  
EXPNO 3  
PROCNO 1

F2 - Acquisition Parameters  
Date\_ 20020515  
Time 16.43  
INSTRUM spect  
PROBHD 5 mm SEI 1H-13  
PULPROG zgpg  
TD 65536  
SOLVENT D2O  
NS 312  
DS 4  
SWH 27777.777 Hz  
FIDRES 0.423855 Hz  
AQ 1.1797160 sec  
RG 16384  
DW 18.000 usec  
DE 20.00 usec  
TE 300.0 K  
D1 2.0000000 sec  
d11 0.0300000 sec  
d12 0.0002000 sec

===== CHANNEL f1 =====  
NUC1 13C  
P1 5.00 usec  
PL1 -2.10 dB  
SFO1 125.7703648 MHz

===== CHANNEL f2 =====  
CPDPRG2 waltz16  
NUC2 1H  
PCPD2 100.00 usec  
PL2 -3.00 dB  
PL12 21.00 dB  
PL13 27.00 dB  
SFO2 500.1325006 MHz

F2 - Processing parameters  
SI 32768  
SF 125.757785 MHz  
WDW EM  
SSB 0  
LB 1.00 Hz  
GB 0  
PC 1.00

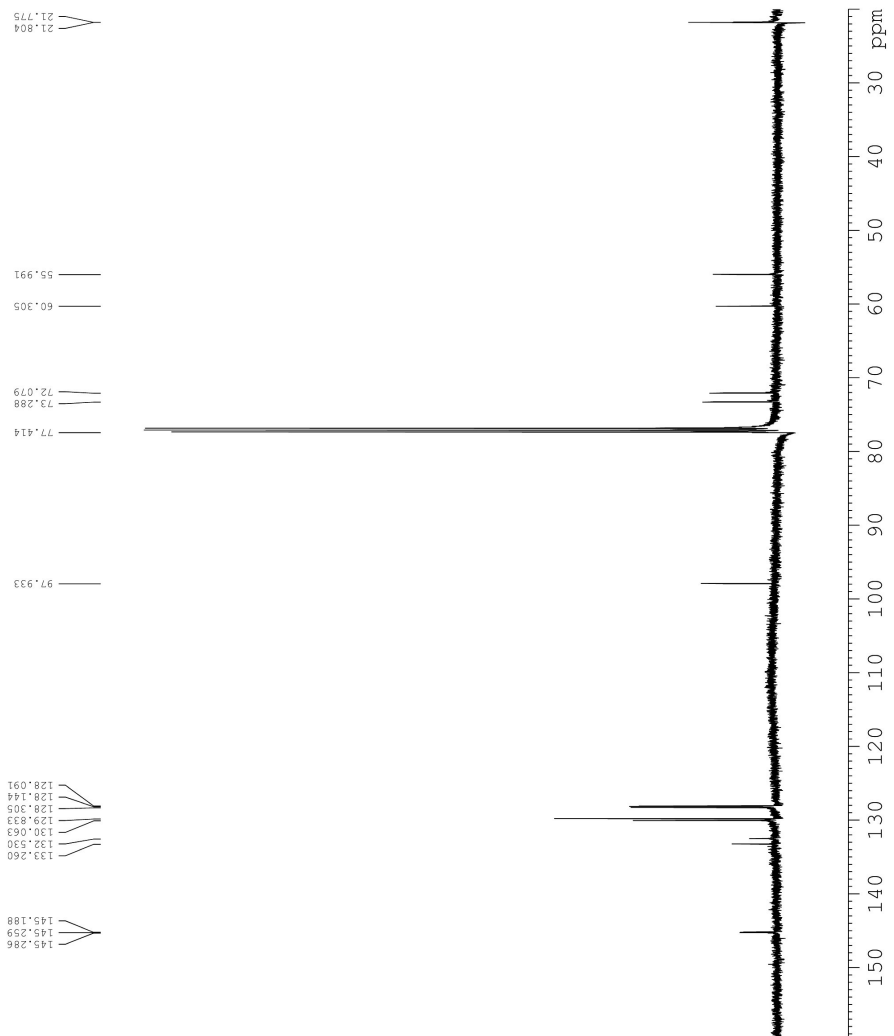

**Methyl 4-*O*-Benzoyl-2,3-bis-(*O*-4-toluenesulfonyl)- $\alpha$ -D-xylopyranoside (14).**

(1) From (13): A suspension of the arabinose tritosylate (13) (200 mg, 0.32 mmol) and sodium benzoate (460 mg, 3.19 mmol) in dry DMF (25 ml) was heated at 130 °C for 4 days. The cooled reaction mixture was evaporated and the residue was extracted with EtOAc (45 ml). The organic extract was washed with 5% HCl (2x25 ml), saturated NaHCO<sub>3</sub> (2x25 ml) and brine (10 ml), then dried (MgSO<sub>4</sub>) and evaporated to a foam. This was triturated with hexane to give the monobenzoate (14) as a gum (120 mg, 65%). Crystallization from EtOAc/hexane gave colorless crystals (73 mg, 40%), m.p. 58-60 °C. *R*<sub>f</sub> (1:2:3 EtOAc/CHCl<sub>3</sub>/ hexane): 0.55. [ $\alpha$ ]<sub>D</sub> -26.0 (*c* 0.4, CHCl<sub>3</sub>) (lit.<sup>4</sup> [ $\alpha$ ]<sub>D</sub> -24.1 (*c* 4.6, CHCl<sub>3</sub>). ES-MS: 577 (MH)<sup>+</sup>, 594 (M+NH<sub>4</sub>)<sup>+</sup>, 599 (M+Na)<sup>+</sup>. <sup>1</sup>H NMR (500 MHz, CDCl<sub>3</sub>): 2.26 (s, 3H, Me); 2.43 (s, 3H, Me); 3.37 (s, 3H, OMe); 3.63 (t, 1H, *J* = 10.8 Hz, H5a); 3.88 (dd, 1H, *J* = 6.1, 11.0 Hz, H5e); 4.34 (dd, 1H, *J* = 3.5, 9.7 Hz, H2); 4.94 (d, 1H, *J* = 3.5 Hz, H1); 5.07-5.19 (m, 1H, H4); 5.33 (t, 1H, *J* = 9.5 Hz, H3); 7.09 (br d, 2H, *J* 8.6 Hz, Ar-H); 7.27 (br d, 2H, *J* = 8.6 Hz, Ar-H); 7.41 (br t, 2H, *J* = 8.5 Hz, Ar-H); 7.56 (br t, 1H, *J* = 8.7 Hz, Ar-H); 7.64 (br d, 4H, *J* = 8.3 Hz, Ar-H); 7.97 (br d, 2H, *J* = 8.4 Hz, Ar-H). <sup>13</sup>C NMR (125 Hz, CDCl<sub>3</sub>) 21.7, 21.8, 56.0, 58.4, 69.5, 75.8, 76.6, 97.6, 127.8, 128.4, 128.9, 129.7, 129.8, 130.1, 130.2, 132.6, 133.5, 134.2, 144.6, 145.4. HRMS (TOF) calcd for C<sub>27</sub>H<sub>29</sub>O<sub>10</sub>S<sub>2</sub> (M+H)<sup>+</sup> 577.1202, found 577.1242.

(2) From (16): A solution of the alcohol (16) (10.9 mg, 0.023 mmol) in pyridine (3 ml) was treated with benzoyl chloride (0.15 ml, 0.18 g, 1.3 mmol). After stirring overnight at room temperature, the solution was evaporated and the residue was dissolved in EtOAc (15 ml). This solution was washed with 5% HCl (2x10 ml), saturated NaHCO<sub>3</sub>



(2x10ml) and brine (10 ml), then dried ( $\text{MgSO}_4$ ) and evaporated to give the benzoate (**14**) (13 mg, 100%), identical by NMR and TLC to the sample prepared from (**13**) (above).

Current Data Parameters  
NAME 11-100-crstzn  
EXPNO 1  
PROCNO 1  
F2 - Acquisition Parameters  
Date\_ 20031014  
Time\_ 18:23  
INSTRUM spect  
PROBHD 5 mm SEI 1H-13  
PULPROG zg  
TD 49152  
SOLVENT CDCl3  
NS 8  
DS 2  
SWH 6009.615 Hz  
FIDRES 0.122266 Hz  
AQ 4.0895796 sec  
RG 453  
DW 83.200 usec  
DE 11.00 usec  
TE 303.0 K  
D1 2.00000000 sec  
MCREST 0.00000000 sec  
MCWRK 0.01500000 sec  
===== CHANNEL f1 =====  
NUC1 1H  
P1 9.00 usec  
PL1 0.00 dB  
SFO1 500.1325006 MHz  
F2 - Processing parameters  
SI 65536  
SF 500.1300370 MHz  
WDW no  
SSB no  
LB 0.00 Hz  
GB 0  
PC 1.00  
ID NMR plot parameters  
CX 22.50 cm  
CY 15.00 cm  
F1P 8.000 ppm  
F1 4001.04 Hz  
F2P 0.00 ppm  
F2 0.00 Hz  
PPMCM 0.35556 ppm/cm  
HZCM 177.82401 Hz/cm

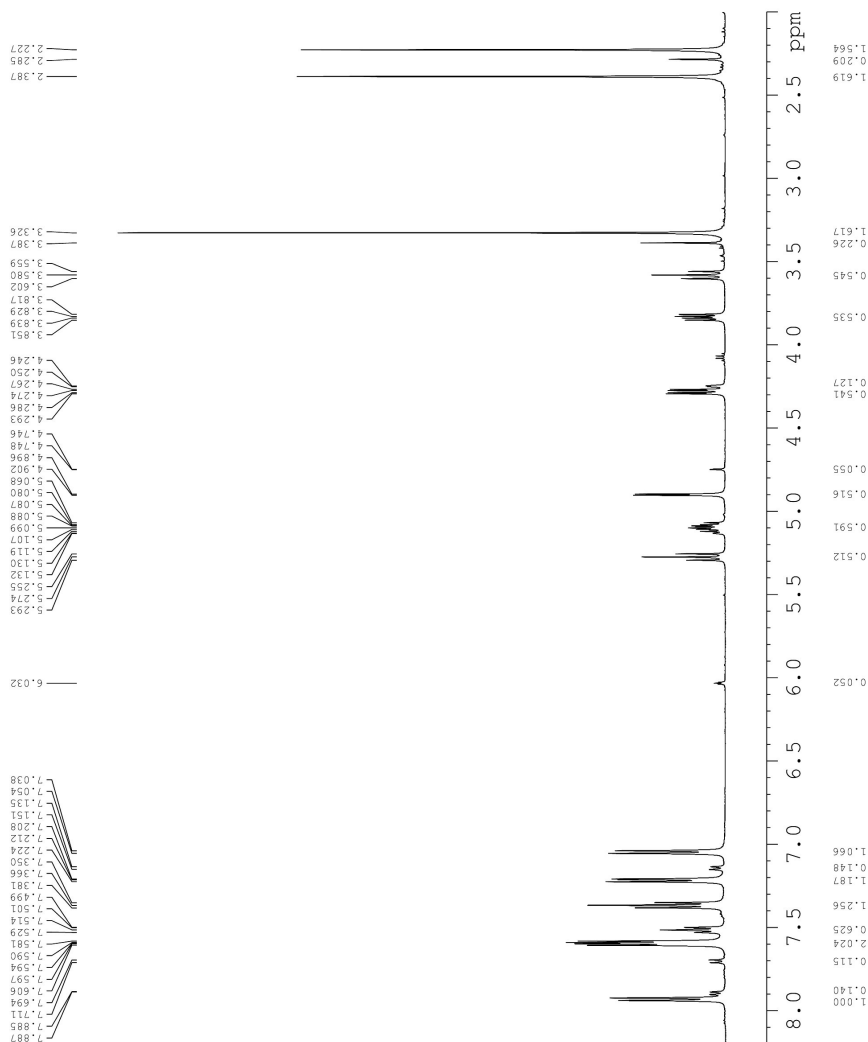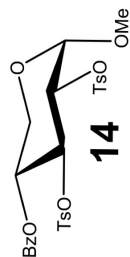

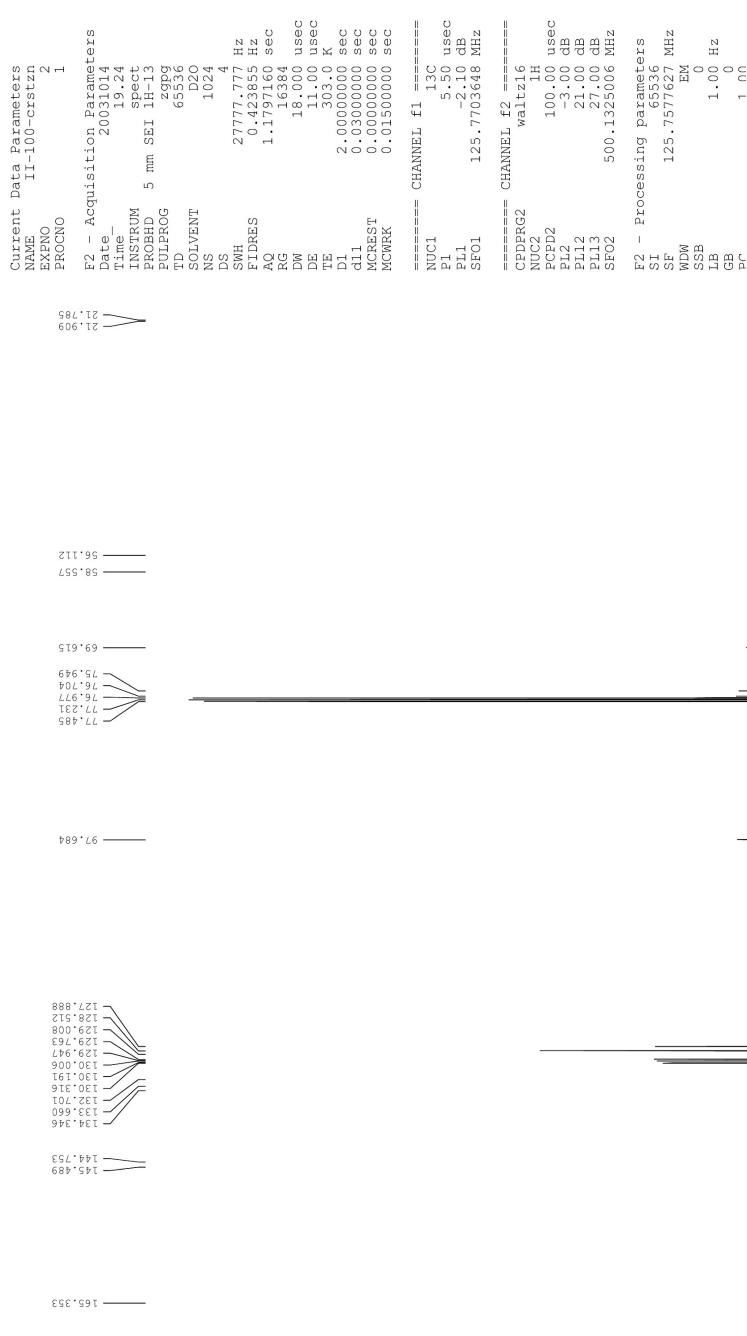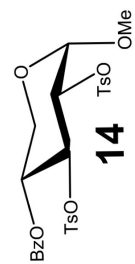

**Methyl 4-Azido-2,3-bis-(*O*-4-toluenesulfonyl)-4-deoxy- $\alpha$ -D-xylopyranoside (15).** A suspension of the tritosylate (**13**) (200 mg, 0.32 mmol) and sodium azide (22 mg, 3.06 mmol) in dry DMF (30 ml) was heated at 130 °C for 45 days. The cooled reaction mixture was evaporated and the residue was extracted with EtOAc (45 ml). The organic extract was washed with 5% HCl (2x25 ml), saturated NaHCO<sub>3</sub> (2x25 ml) and brine (10 ml), then dried (MgSO<sub>4</sub>) and evaporated to a gum. This was purified by column chromatography (eluent: EtOAc/CHCl<sub>3</sub>/hexane 1:2:3) to give the title azido derivative (**15**) as a colorless gum (75 mg, 47%). Recrystallization from EtOAc/hexane gave colorless crystals (25 mg, 13%), m.p. 55-57 °C.  $[\alpha]_D^{25}$  81.0 (*c* 0.5, CHCl<sub>3</sub>). ES-MS: 498 (MH)<sup>+</sup>, 515 (M+NH<sub>4</sub>)<sup>+</sup>, 520 (M+Na)<sup>+</sup>. <sup>1</sup>H NMR (500 MHz, CDCl<sub>3</sub>): 2.41 (s, 3H, Me); 2.42 (s, 3H, Me); 3.29 (s, 3H, OMe); 3.44-3.50 (m, 2H, H4,5e); 3.68 (dd, 1H, *J* = 4.1, 9.7 Hz, H5a); 4.27 (dd, 1H, *J* = 4.5, 9.7 Hz, H2); 4.83-4.88 (m, 2H, H1,3); 7.29 (br d, 2H, *J* = 8.4 Hz, Ar-H); 7.30 (br d, 2H, *J* = 8.6 Hz, Ar-H); 7.69 (br d, 2H, *J* = 8.4 Hz, Ar-H); 7.79 (br d, 2H, *J* = 8.3 Hz, Ar-H). <sup>13</sup>C NMR (125 Hz, CDCl<sub>3</sub>): 22.1, 22.2, 56.3, 59.8, 63.3, 61.2, 76.0, 98.0, 128.6, 128.7, 130.2, 130.3, 133.2, 134.4, 145.4, 145.8. HRMS (TOF) calcd for C<sub>20</sub>H<sub>24</sub>O<sub>8</sub>S<sub>2</sub> (M+H)<sup>+</sup> 498.1005, found 498.0971.

Current Data Parameters  
NAME II-101-cc-fc1-cl-cstzn  
EXPNO 1  
PROCNO 1  
F2 - Acquisition Parameters  
Date\_ 20031010  
Time\_ 20.29  
INSTRUM spect  
PROBHD 5 mm SEI 1H-13  
PULPROG zg  
TD 49152  
SOLVENT CDCl3  
NS 8  
DS 2  
SWH 6009.615 Hz  
FIDRES 0.122266 Hz  
AQ 4.0895796 sec  
RG 777  
DE 83.200 usec  
TE 303.0 K  
D1 2.00000000 sec  
MCREST 0.00000000 sec  
MCWRK 0.01500000 sec  
===== CHANNEL f1 =====  
NUC1 1H  
P1 9.00 usec  
PL1 0.00 dB  
SFO1 500.1325006 MHz  
F2 - Processing parameters  
SI 32768  
SF 500.1300211 MHz  
WDW no  
SSB 0  
LB 0.00 Hz  
GB 0  
PC 1.00  
ID NMR plot parameters  
CX 22.50 cm  
CY 15.00 cm  
FIP 8.000 ppm  
F1 4001.04 Hz  
F2 1001.00 ppm  
F3 1001.00 Hz  
PPMCM 0.2666 Hz/cm  
HZCM 133.36801 Hz/cm

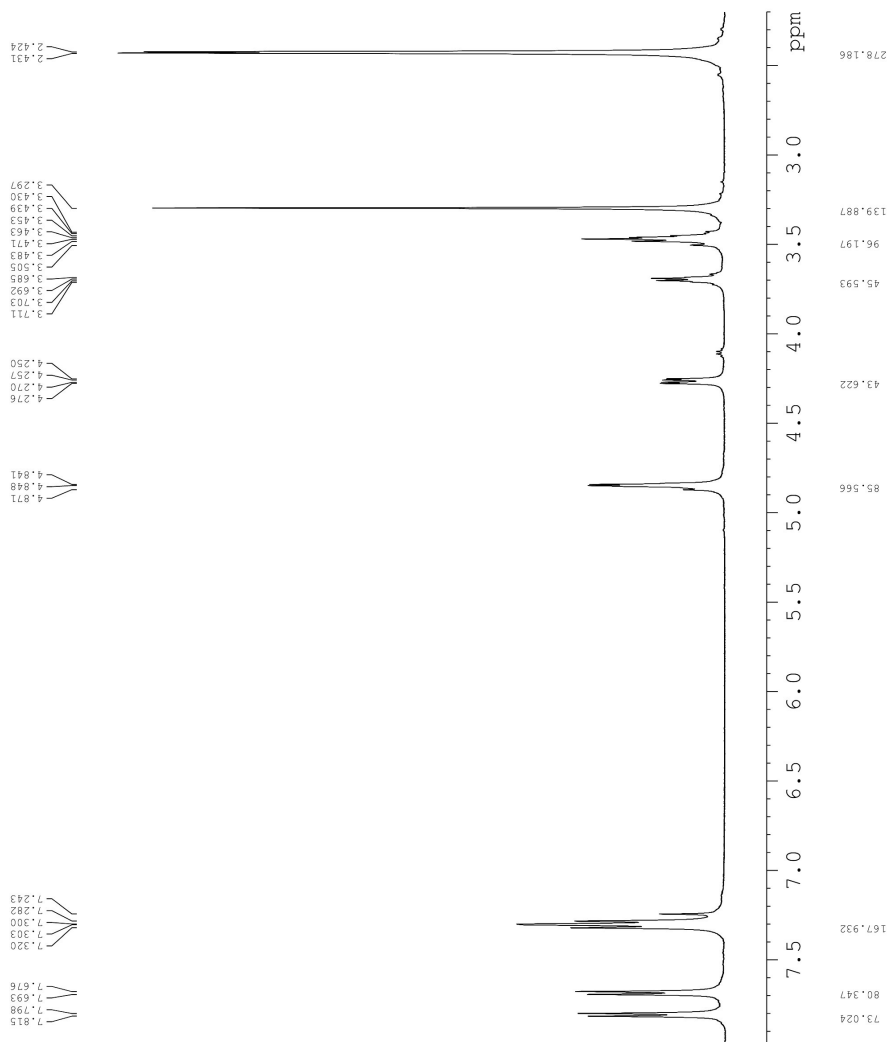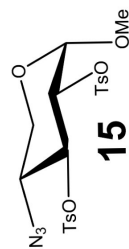

Current Data Parameters  
NAME II-101-cc-fc1-crstzn  
EXPNO 2  
PROCNO 1

F2 - Acquisition Parameters  
Date\_ 20031015  
Time\_ 0.11  
INSTRUM spect  
PROBHD 5 mm SEI IH-13  
PULPROG zgpg  
TD 65536  
SOLVENT D2O  
NS 4096  
DS 4  
SWH 27777.777 Hz  
FIDRES 0.423855 Hz  
AQ 1.1797160 sec  
RG 16384  
DW 18.000 usec  
DE 11.00 usec  
TE 303.0 K  
D1 2.00000000 sec  
d11 0.03000000 sec  
MCREST 0.00000000 sec  
MCWRK 0.01500000 sec

===== CHANNEL f1 =====  
NUC1 <sup>13</sup>C  
P1 5.50 usec  
PL1 -2.10 dB  
SF01 125.7703648 MHz

===== CHANNEL f2 =====  
CPDPRG2 waltz16  
NUC2 <sup>1</sup>H  
PCPD2 100.00 usec  
PL2 -3.00 dB  
PL12 21.00 dB  
PL13 27.00 dB  
SFO2 500.1325006 MHz

F2 - Processing parameters  
SI 65536  
SF 125.7577614 MHz  
WDW EM  
SSB 0  
LB 1.00 Hz  
GB 0  
PC 1 00

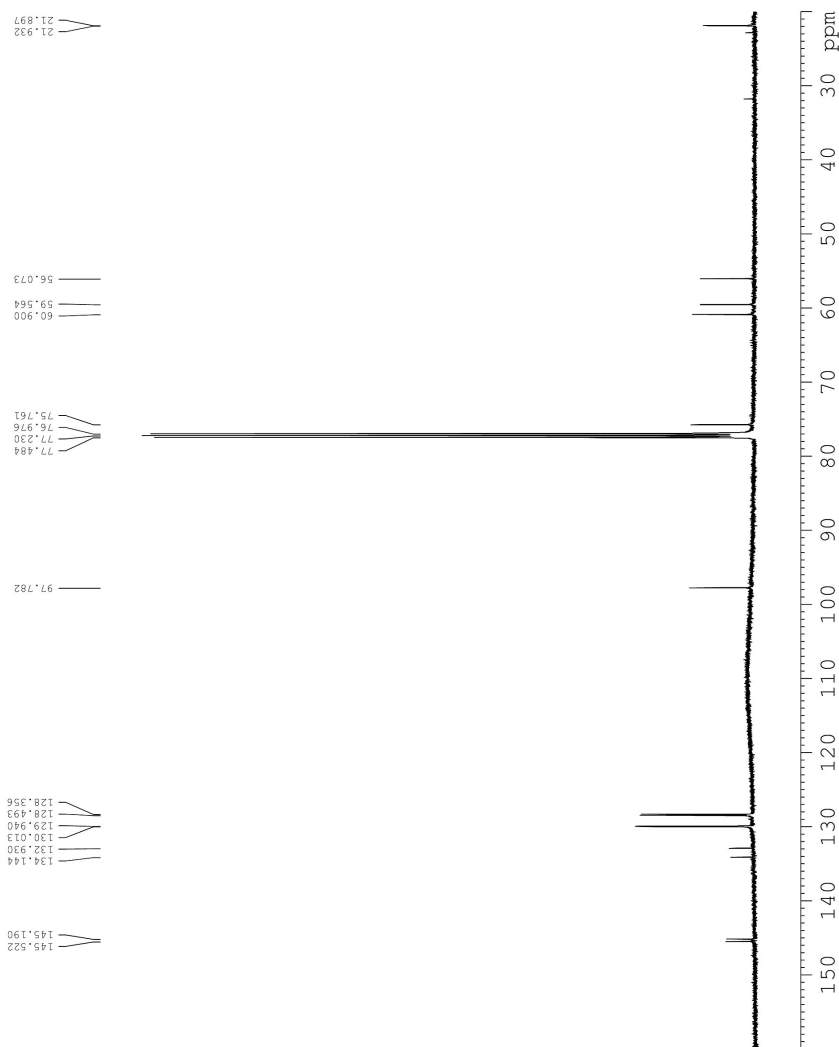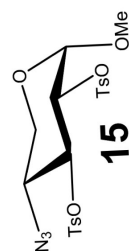

**Methyl 2,3-Bis-(*O*-4-toluenesulfonyl)- $\alpha$ -D-xylopyranoside (16).** A suspension of the tritosylate (**13**) (200 mg, 319  $\mu$ mol) and sodium nitrite (220 mg, 3.19 mmol) in dry DMF (5 ml) was heated at 130 °C for 7 days. The cooled mixture was evaporated and the residue was taken up in EtOAc (15 ml). The organic phase was washed with 5% HCl (2x15 ml), saturated NaHCO<sub>3</sub> (2x15 ml) and brine (10 ml), then dried (MgSO<sub>4</sub>) and evaporated to give the ditosylate as colorless crystals (48 mg, 32%), m.p. 152-154 °C. Recrystallization from EtOAc/hexane raised the mp. to 164-166 °C (lit.<sup>4</sup> m.p. 168-169 °C).  $[\alpha]_D$  59.5 (*c* 0.1, CHCl<sub>3</sub>) (lit.<sup>4</sup>  $[\alpha]_D$  60.3 (*c* 1.7, CHCl<sub>3</sub>)). ES-MS: 473 (MH)<sup>+</sup>, 490 (M+NH<sub>4</sub>)<sup>+</sup>, 495 (M+Na)<sup>+</sup>. <sup>1</sup>H NMR (500 MHz, CDCl<sub>3</sub>): 2.42 (s, 3H, Me); 2.44 (s, 3H, Me); 3.23 (s, 3H, OMe); 3.50 (br t, 1H, *J* = 11.0 Hz, H5a); 3.72 (dd, 1H, *J* = 6.1, 11.4 Hz, H5b); 3.80-3.85 (m, 1H, H4); 4.28 (dd, 1H, *J* = 3.6, 9.6 Hz, H2); 4.69 (d, 1H, *J* = 3.5 Hz, H1); 4.72 (dd, 1H, *J* = 8.6, 9.6 Hz, H3); 7.27 (br d, 2H, *J* = 8.6 Hz, Ar-H); 7.31 (br d, 2H, *J* = 8.6 Hz, Ar-H); 7.64 (br d, 2H, *J* = 8.3 Hz, Ar-H); 7.75 (br d, 2H, *J* = 8.3 Hz, Ar-H); OH not observed. <sup>13</sup>C NMR (125 Hz, CDCl<sub>3</sub>): 21.9, 22.0, 55.7, 60.9, 69.3, 75.8, 80.9, 97.3, 128.2, 128.6, 130.0, 130.1, 132.5, 133.3, 145.4, 145.7.

Current Data Parameters  
NAME 11-102-crstzn  
EXPNO 1  
PROCNO 1

F2 - Acquisition Parameters  
Date\_ 20031016  
Time\_ 11.11  
INSTRUM spect  
PROBHD 5 mm SEI IH-13  
PULPROG zg  
TD 49152  
SOLVENT CDCl3  
NS 8  
DS 2  
SWH 6009.615 Hz  
FIDRES 0.13266 Hz  
AQ 4.085596 sec  
RG 256  
DE 83.200 usec  
TE 302.9 K  
D1 2.00000000 sec  
MCREST 0.00000000 sec  
MCWRK 0.01500000 sec

CHANNEL f1

NUC1 1H  
P1 9.00 usec  
PL1 0.00 dB  
SFO1 500.1323006 MHz

F2 - Processing parameters  
SI 65536  
SF 500.1300232 MHz  
WDW no  
SSB 0  
LB 0.00 Hz  
GB 0  
PC 1.00

1D NMR plot parameters  
CX 22.50 cm  
CI 15.00 cm  
FI 8.00 ppm  
F1 409.204 Hz  
F2 1160.29 Hz  
PPMCM 0.25778 ppm/cir  
HZCM 128.92241 Hz/cm

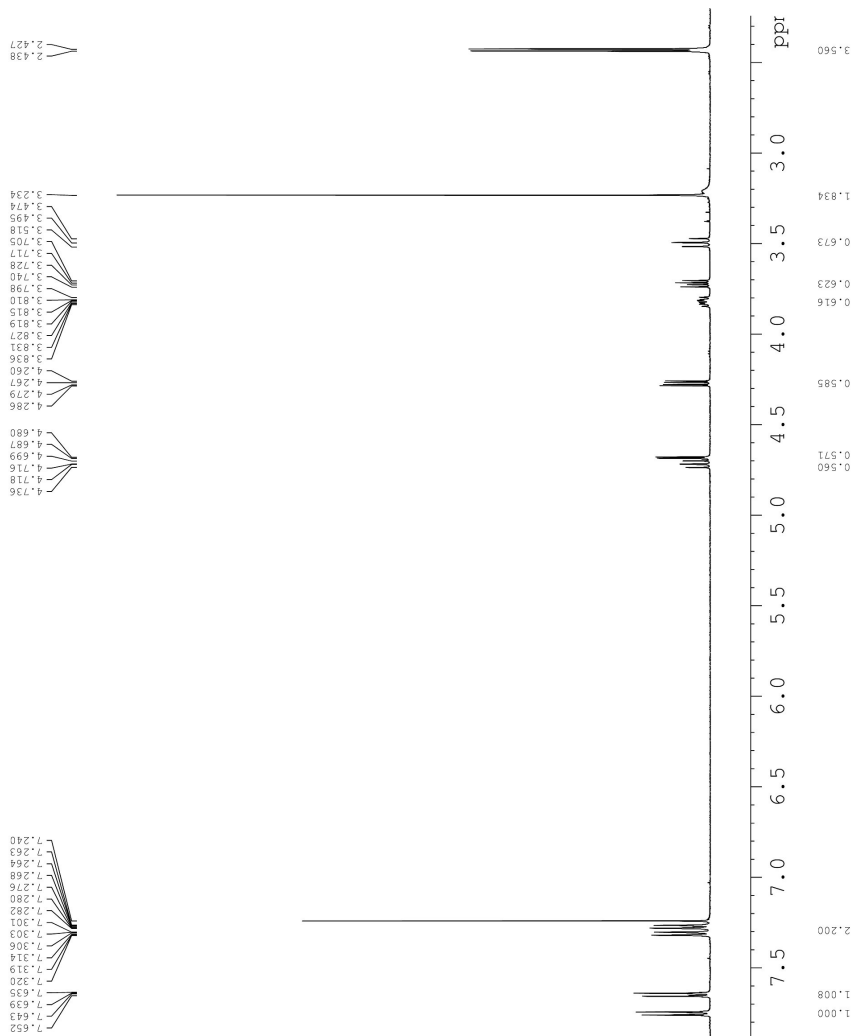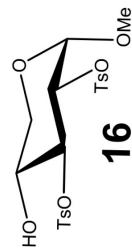



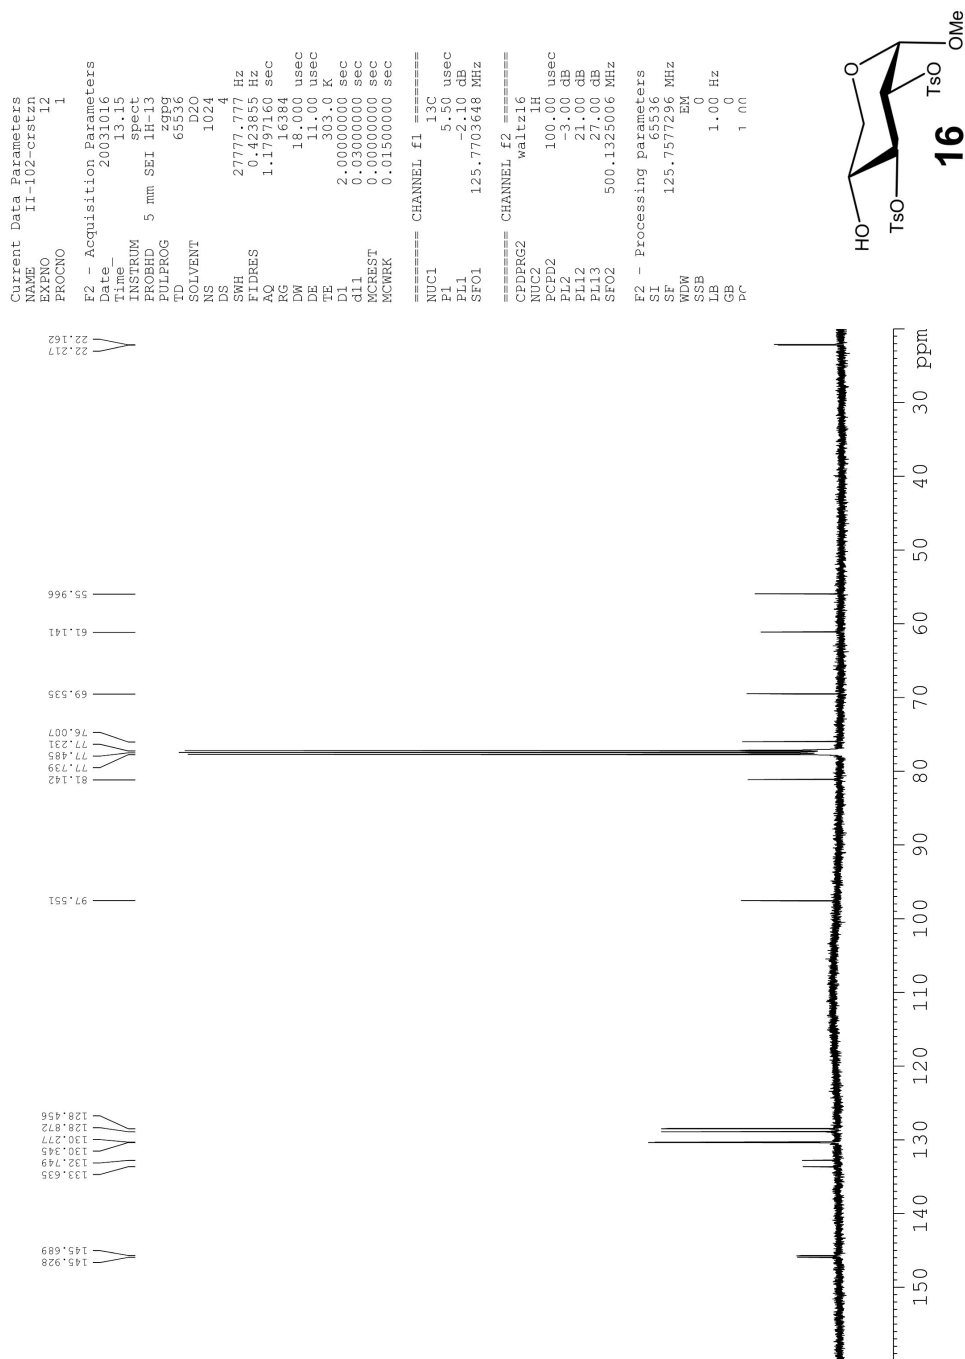

**Methyl  $\alpha$ -D-Ribopyranoside (18).** A solution of D-ribose (**17**) (2.00 g, 13.3 mmol) in MeOH (100 ml) was treated dropwise with acetyl chloride (2.0 ml). The solution was then heated at 50 °C overnight. The cooled solution was neutralized by the addition of sodium methoxide solution, and then the mixture was filtered through Celite® and evaporated to a syrup (2.60 g)  $R_f$  (3:2:1 CHCl<sub>3</sub>/EtOAc/MeOH): 0.23.

A small sample of this was converted to its triacetate by treatment with acetic anhydride in pyridine. The <sup>1</sup>H NMR spectrum of the triacetate showed that mixture contained the  $\alpha$ - and  $\beta$ -anomers in a ratio of 85:15. The crude mixture of anomers (**18**) was used directly for the next step.

Triacetate derivative ( $\alpha$ -anomer): <sup>1</sup>H NMR (500 MHz, CDCl<sub>3</sub>): 2.00 (s, 3H, OAc); 2.07 (s, 3H, OAc); 2.09 (s, 3H, OAc); 3.39 (s, 3H, OMe); 3.76 (dd, 1H,  $J$  = 4.1, 12.6 Hz, H5a); 3.96 (dd, 1H,  $J$  = 2.7, 12.6 Hz, H5e); 4.68 (d, 1H,  $J$  = 3.3 Hz, H1); 5.00 (dt, 1H,  $J$  = 0.9, 3.5 Hz, H4); 5.10-5.12 (m, 1H, H2); 5.34 (t, 1H,  $J$  = 3.6 Hz, H3).

**Methyl 2,3,4-Tris-(*O*-4-toluenesulfonyl)- $\alpha$ -D-ribopyranoside (19).** 4-Toluenesulfonyl chloride (35.0 g, 184 mmol) was added portionwise to a stirred, chilled (0 °C) solution of the crude mixture of anomers of (**18**) (2.60 g, 13.3 mmol) in pyridine (50 ml). After stirring for 5 days, the mixture was subjected to ultrasonication in a cleaning bath for 3 h. The mixture was poured onto 100 g ice. After the ice had melted, the mixture was extracted with EtOAc (2x100 ml). The organic phase was washed with 5% HCl (2x100 ml), saturated NaHCO<sub>3</sub> (2x100 ml) and brine (100 ml), then dried (MgSO<sub>4</sub>) and evaporated to give a syrup. This was chromatographed on silica (eluent: EtOAc/CHCl<sub>3</sub>/hexane 1:2:3) to give the  $\alpha$ -tritosylate (**19**) as colorless syrup,

contaminated with a little of the  $\beta$ -anomer (2.04 g, 21%). A sample recrystallized twice from EtOAc/hexane gave the pure  $\alpha$ -isomer, m.p. 147-149 °C.  $[\alpha]_D$  31.0 (*c* 0.5, CHCl<sub>3</sub>). ES-MS: 627 (MH)<sup>+</sup>, 644 (M+NH<sub>4</sub>)<sup>+</sup>, 649 (M+Na)<sup>+</sup>. <sup>1</sup>H NMR (500 MHz, CDCl<sub>3</sub>): 2.41 (s, 3H, Me); 2.43 (s, 6H, 2xMe); 3.18 (s, 3H, OMe); 3.80 (dd, 1H, *J* = 4.5, 11.0 Hz, H5a); 4.00 (dd, 1H, *J* = 2.9, 10.9 Hz, H5b); 4.21 (ddd, 1H, *J* = 2.9, 4.4, 7.4 Hz, H4); 4.63 (d, 1H, *J* = 4.7 Hz, H2); 4.81 (dd, 1H, *J* = 4.7, 7.6 Hz, H3); 4.89 (s, 1H, H1); 7.22-7.25 (m, 6H, Ar-H); 7.54 (br d, 2H, *J* = 8.3 Hz, Ar-H); 7.70 (br d, 2H, *J* = 8.3 Hz, Ar-H); 7.77 (br d, 2H, *J* = 8.3 Hz, Ar-H). <sup>13</sup>C NMR (125 Hz, CDCl<sub>3</sub>) 22.1, 22.2, 22.3, 55.7, 68.0, 74.8, 77.3, 79.5, 105.6, 128.4, 128.5, 128.7, 130.4, 130.5, 130.7, 132.1, 132.9, 133.0, 145.6, 146.0, 146.5. HRMS (TOF) calcd for C<sub>27</sub>H<sub>30</sub>O<sub>11</sub>S<sub>3</sub>Na (M+Na)<sup>+</sup> 649.0848, found 649.1091. HRMS (TOF) calcd for C<sub>26</sub>H<sub>27</sub>O<sub>10</sub>S<sub>3</sub> (M+H-MeOH)<sup>+</sup> 595.0766, found 595.1001.

Current Data Parameters  
 NAME 106-cc-irc2-cistzn  
 EXPNO 7  
 PROCNO 1

F2 - Acquisition Parameters  
 Date 20030603  
 Time 18:45  
 INSTRUM spect  
 PROBHD 5 mm SEI 1H-13  
 PULPROG zg  
 TD 49152  
 SOLVENT D2O  
 NS 8  
 DS 2  
 SWH 6009.615 Hz  
 FIDRES 0.122286 Hz  
 AQ 4.0895796 sec  
 RG 500.0  
 DE 83.200 usec  
 TE 305.0 K  
 D1 2.00000000 sec  
 MCREST 0.00000000 sec  
 MCWRK 0.01500000 sec

===== CHANNEL f1 =====  
 NUC1 1H  
 PL 9.00 usec  
 PL1 0.00 dB  
 SFO1 500.1325006 MHz  
 F2 - Processing parameters  
 SI 32768  
 SF 500.1300275 MHz  
 WDW no  
 SSB 0  
 LB 0.00 Hz  
 GB 0  
 PC 1.00

1D NMR plot parameters  
 CX 22.50 cm  
 CY 15.00 cm  
 FIP 10.000 ppm  
 FI1 5001.30 Hz  
 F2P -250.00 ppm  
 F2 0.46667 Hz/cm  
 F2MCM 233.39403 Hz/cm

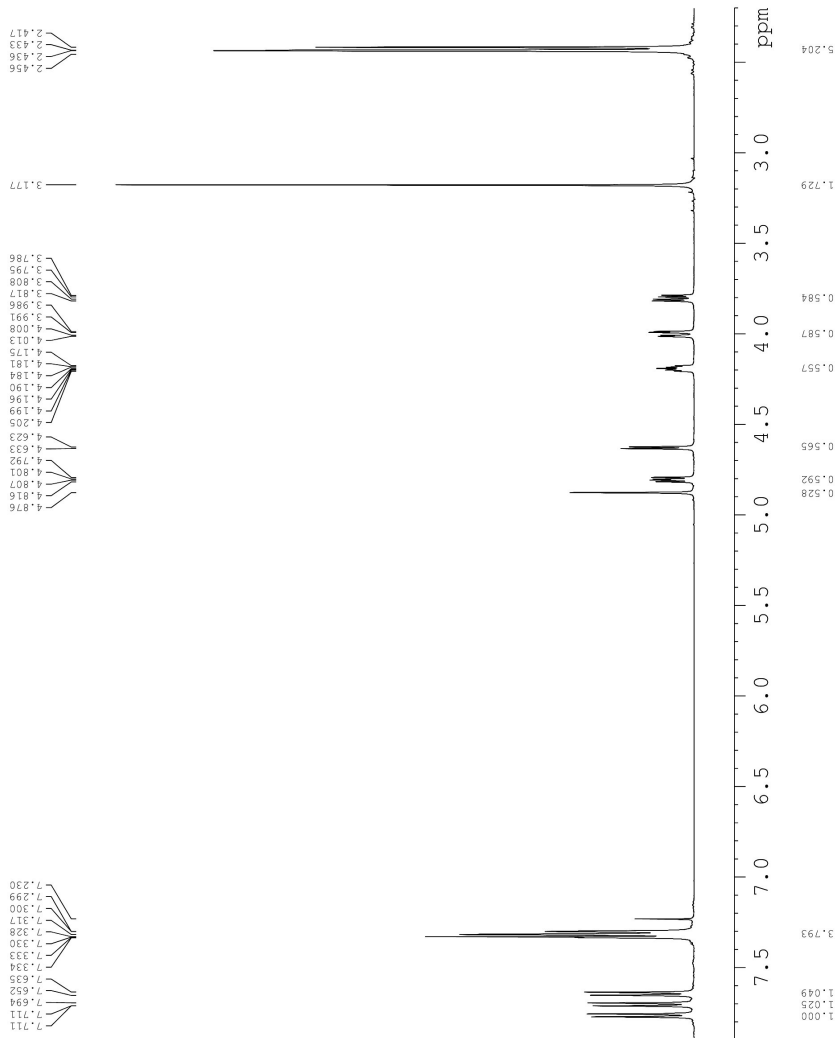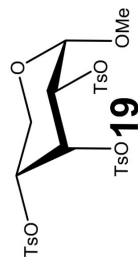

Current Data Parameters  
 NAME 106-cc-fic2-estzn  
 EXPNO 3  
 PROCNO 1

F2 - Acquisition Parameters

Date 20030528  
 Time 8.15  
 INSTRUM spect  
 PROHD 5 mm SEI 1H-13  
 PULPROG zgpg  
 TD 65536  
 SOLVENT CDCl3  
 NS 13990  
 DS 4  
 SWH 27777.777 Hz  
 FIDRES 0.423855 Hz  
 AQ 1.1797160 sec  
 RG 16384  
 DW 18.000 usec  
 DE 11.00 usec  
 TE 294.3 K  
 D1 2.0000000 sec  
 d11 0.0300000 sec  
 MCREST 0.0000000 sec  
 MCWRR 0.0150000 sec

===== CHANNEL f1 =====

NUC1 13C  
 P1 5.00 usec  
 PL1 -2.10 dB  
 SFO1 125.7703648 MHz

===== CHANNEL f2 =====

CPDPRG2 waltz16  
 NUC2 1H  
 PCPD2 100.00 usec  
 PL2 -3.00 dB  
 PL12 21.00 dB  
 PL13 27.00 dB  
 SFO2 500.1325006 MHz

F2 - Processing parameters

SF 625.1325006 MHz  
 SF 125.7577648 MHz  
 WDW EM  
 SSB 0  
 LB 1.00 Hz  
 GB 0  
 PC 1.00

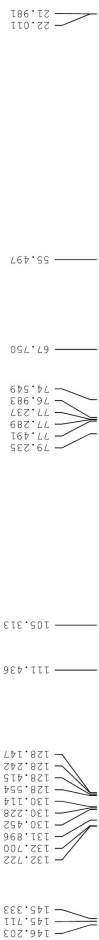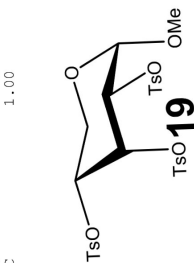

**Methyl 4-Benzoyl-2,3-bis-(*O*-4-toluenesulfonyl)- $\beta$ -L-lyxopyranoside (20).**

(1) From (**19**): A suspension of the tritosylate (**19**) (30 mg, 0.048 mmol) and sodium benzoate (48 mg, 0.34 mmol) in 2.5 ml of dry DMF was heated at 130 °C for 20 h. The cooled reaction mixture was evaporated, and the residue was taken up into 50 ml EtOAc and washed with 5% HCl (2x50 ml), saturated NaHCO<sub>3</sub> (2x50 ml) and brine (50 ml), then dried (MgSO<sub>4</sub>) and evaporated to give the benzoate (**20**) as a solid (21 mg, 76%), m.p. 85-87 °C. Recrystallization from EtOAc/hexane raised the m.p. to 90-92 °C.  $[\alpha]_D^{25}$  21.2 (*c* 0.2, CHCl<sub>3</sub>). ES-MS: 577 (MH)<sup>+</sup>, 594 (M+NH<sub>4</sub>)<sup>+</sup>, 599 (M+Na)<sup>+</sup>. <sup>1</sup>H NMR (500 MHz, CDCl<sub>3</sub>): 2.27 (s, 3H, Me); 2.47 (s, 3H, Me); 3.22 (s, 3H, OMe); 3.79 (dd, 1H, *J* = 3.8, 13.1 Hz, H5a); 4.34-4.39 (m, 2H, H4,5b); 4.83 (d, 1H, *J* = 4.4 Hz, H2); 5.00 (dd, 1H, *J* = 4.5, 7.7 Hz, H3); 5.02 (br s, 1H, H1); 7.09 (br d, 2H, *J* = 8.5 Hz, Ar-H); 7.41 (br d, 2H, *J* = 8.6 Hz, Ar-H); 7.45 (br t, 2H, *J* = 6.5 Hz, Ar-H); 7.60 (br t, 1H, *J* = 7.5 Hz, Ar-H); 7.85 (br d, 2H, *J* = 8.3 Hz, Ar-H); 7.92 (br d, 2H, *J* = 8.3 Hz, Ar-H). <sup>13</sup>C NMR (125 Hz, CDCl<sub>3</sub>) 21.7, 21.8, 55.4, 62.0, 74.4, 77.4, 79.6, 105.4, 128.1, 128.4, 128.6, 129.7, 130.1, 131.9, 132.8, 133.3, 133.4, 145.5, 145.9, 165.6. HRMS (TOF) calcd for C<sub>27</sub>H<sub>29</sub>O<sub>10</sub>S<sub>2</sub> (M+H)<sup>+</sup> 577.1202, found 577.1201.

(2) From (**22**): A solution of the ditosylate (**22**) (13 mg, 0.028 mmol) in pyridine (3 ml) was treated with benzoyl chloride (0.15 ml, 0.18 g, 1.3 mmol). After stirring overnight the solution was evaporated, then taken up in EtOAc (10 ml). This was washed with 5% HCl (3x10 ml), saturated NaHCO<sub>3</sub> (2x10 ml) and brine (10 ml), then dried (MgSO<sub>4</sub>) and evaporated to give the benzoate (**20**) (10 mg, 63%), identical by NMR and TLC to that prepared from (**19**) (above).

Current Data Parameters  
NAME 11-11-3  
EXPNO 1  
PROCNO 1

F2 - Acquisition Parameters  
Date\_ 20030603  
Time\_ 17.58  
INSTRUM spect  
PROBHD 5 mm SEI 1H-13  
PULPROG zg  
TD 49152  
SOLVENT CDCl3  
NS 8  
DS 2

SWH 6009.615 Hz  
FIDRES 0.122266 Hz  
AQ 4.0895796 sec  
RG 128  
DM 83.228  
DE 11.20 usec  
TE 305.0 K  
D1 2.00000000 sec  
MCREST 0.00000000 sec  
MCWRK 0.01500000 sec

===== CHANNEL f1 =====  
NUC1 1H  
P1 9.00 usec  
PL1 0.00 dB  
SFO1 500.1325006 MHz

F2 - Processing parameters  
SI 32768  
SF 500.130018 MHz  
WDW EM  
SSB 0  
LB 1.00 Hz  
GB 0  
PC 1.00

1D NMR plot parameters  
CX 22.50 cm  
CY 15.00 cm  
FIP 8.000 Epm  
F1 4001.04 Hz  
F2 1001.00 Epm  
F3 1001.00 Hz  
PQCM 0.2666 Hz/cm  
H2CM 133.36800 Hz/cm

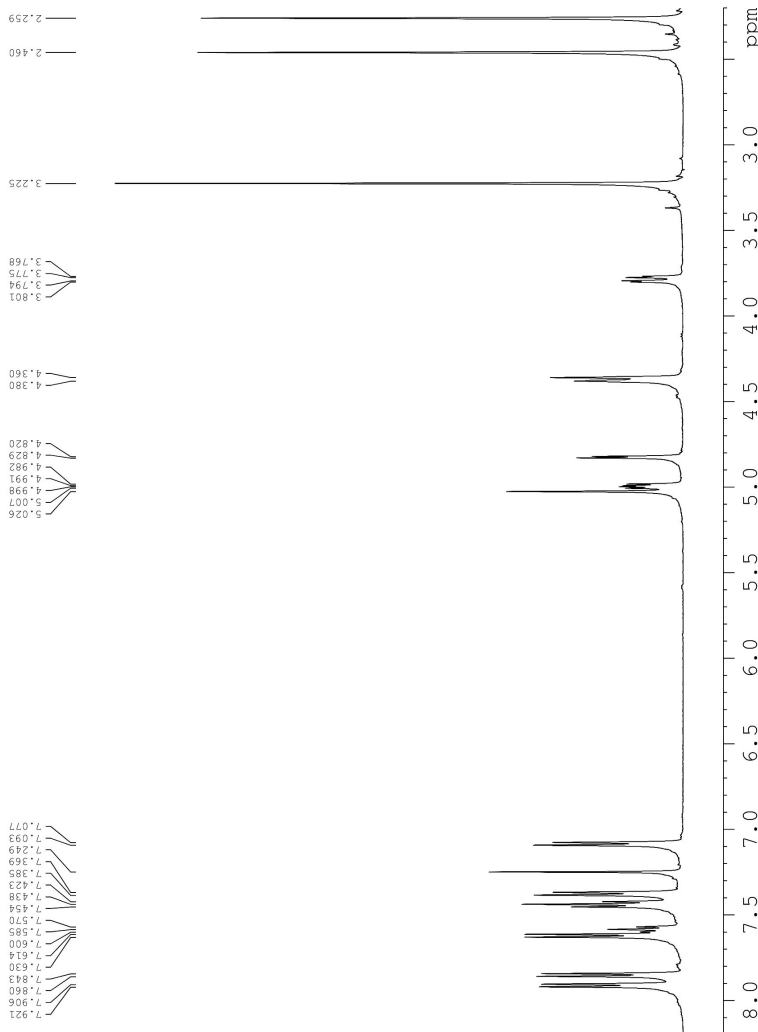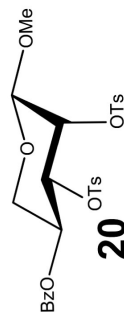

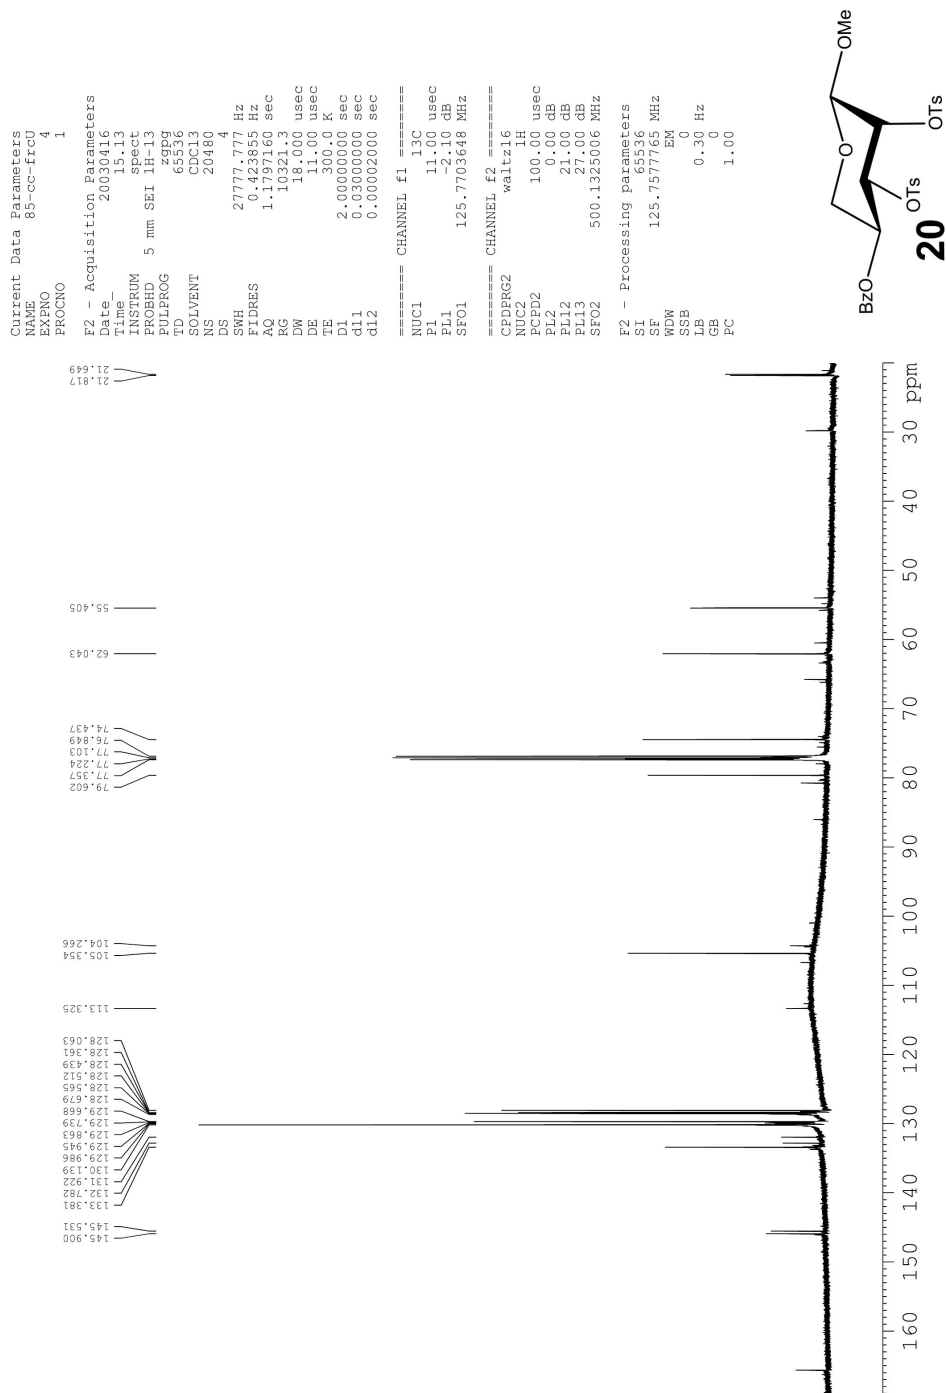



**Methyl 4-Azido-2,3-bis-(*O*-4-toluenesulfonyl)-4-deoxy- $\beta$ -L-lyxopyranoside (21).** A suspension of the tritosylate (**19**) (30 mg, 0.048 mmol) and sodium azide (28 mg, 0.43 mmol) in 2.5 ml of dry DMF was heated at 130 °C for 40 h. The cooled reaction mixture was evaporated, and the residue was taken up into 50 ml EtOAc and washed with 5% HCl (2x50 ml), saturated NaHCO<sub>3</sub> (2x50 ml) and brine (50 ml), then dried (MgSO<sub>4</sub>) and evaporated to give the azide (**21**) as a solid (16 mg, 67%), m.p. 110-115 °C.  $[\alpha]_D^{25}$  70.8 (*c* 0.6, CHCl<sub>3</sub>). ES-MS: 498 (MH)<sup>+</sup>, 515 (M+NH<sub>4</sub>)<sup>+</sup>, 520 (M+Na)<sup>+</sup>. <sup>1</sup>H NMR (500 MHz, CDCl<sub>3</sub>): 2.44 (s, 3H, Me); 2.45 (s, 3H, Me); 3.04 (dd, 1H, *J* = 4.7, 13.4 Hz, H5a); 3.33 (s, 3H, OMe); 3.39 (dd, 1H, *J* = 3.0, 13.4 Hz, H5b); 4.20 (ddd, 1H, *J* = 3.1, 4.7, 7.8 Hz, H4); 4.67 (d, 1H, *J* = 4.7, H2); 4.82 (dd, 1H, *J* = 4.7, 7.8 Hz, H3); 4.95 (br s, 1H, H1); 7.32 (br d, 2H, *J* = 8.0 Hz, Ar-H); 7.34 (br d, 2H, *J* = 8.0 Hz, Ar-H); 7.69 (br d, 2H, *J* = 8.3 Hz, Ar-H); 7.79 (br d, 2H, *J* = 8.3 Hz, Ar-H). <sup>13</sup>C NMR (125 Hz, CDCl<sub>3</sub>) 21.9, 22.0, 51.6, 56.2, 75.1, 78.5, 79.6, 106.3, 128.3, 128.4, 130.2, 130.3, 132.4, 133.0, 145.7, 146.0. HRMS (TOF) calcd for C<sub>20</sub>H<sub>24</sub>N<sub>3</sub>O<sub>8</sub>S<sub>2</sub> (M+H)<sup>+</sup> 498.1005, found 498.1182.

Current Data Parameters  
NAME 11-12-1  
EXPNO 1  
PROCNO 1

F2 - Acquisition Parameters  
Date\_ 20030530  
Time 14.12  
INSTRUM spect  
PROBHD 5 mm SEI 1H-13  
PULPROG zg  
TD 49152  
SOLVENT CDCl3  
NS 8  
DS 2  
SWH 6009.615 Hz  
FIDRES 0.122266 Hz  
AQ 4.0895796 sec  
RG 114  
DE 83.210 usec  
TE 11.00 usec  
DE 305.0 K  
D1 2.00000000 sec  
MCREST 0.00000000 sec  
MCWRK 0.01500000 sec

===== CHANNEL f1 =====  
NUC1 1H  
P1 9.00 usec  
PL1 0.00 dB  
SFO1 500.1325006 MHz

F2 - Processing parameters  
SI 32768  
SF 500.1300220 MHz  
WDW no  
SSB 0  
LB 0.00 Hz  
GB 0  
PC 1.00

1D NMR plot parameters  
CX 22.50 cm  
CY 15.00 cm  
FIP 8.000 ppm  
F1 4001.04 Hz  
F2 0.000 ppm  
F3 0.000 Hz  
PPMCM 0.35556 Hz/cm  
HECM 177.82401 Hz/cm

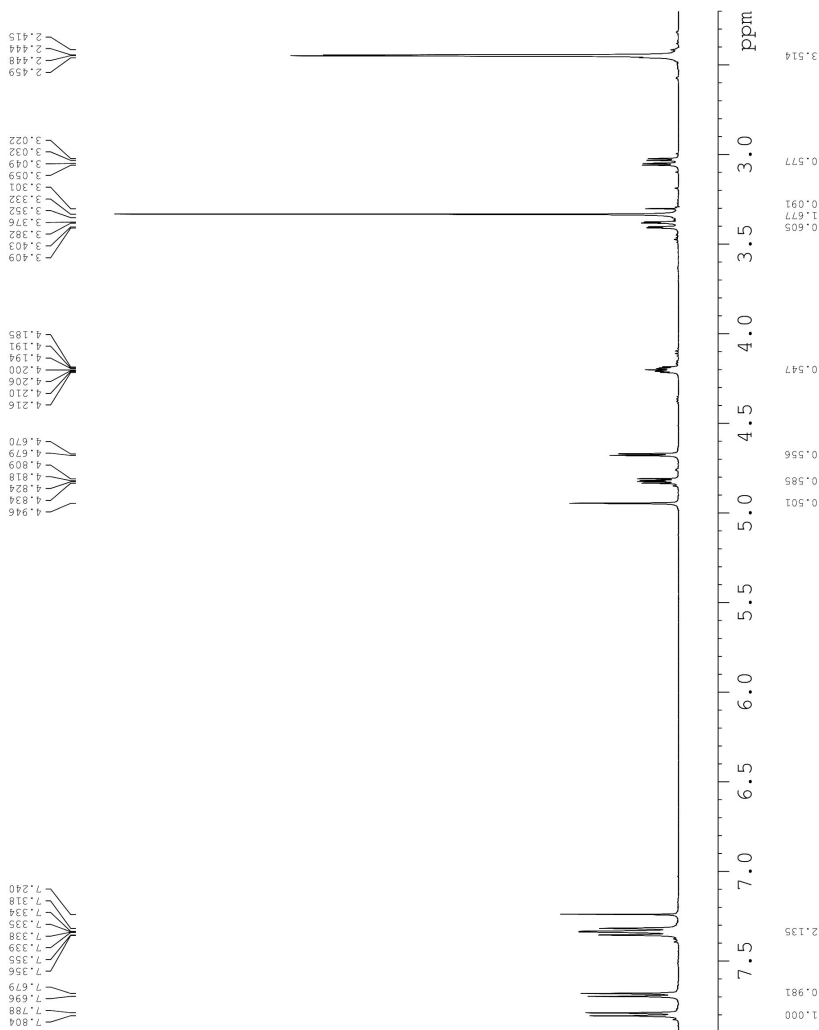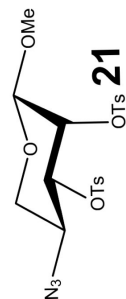

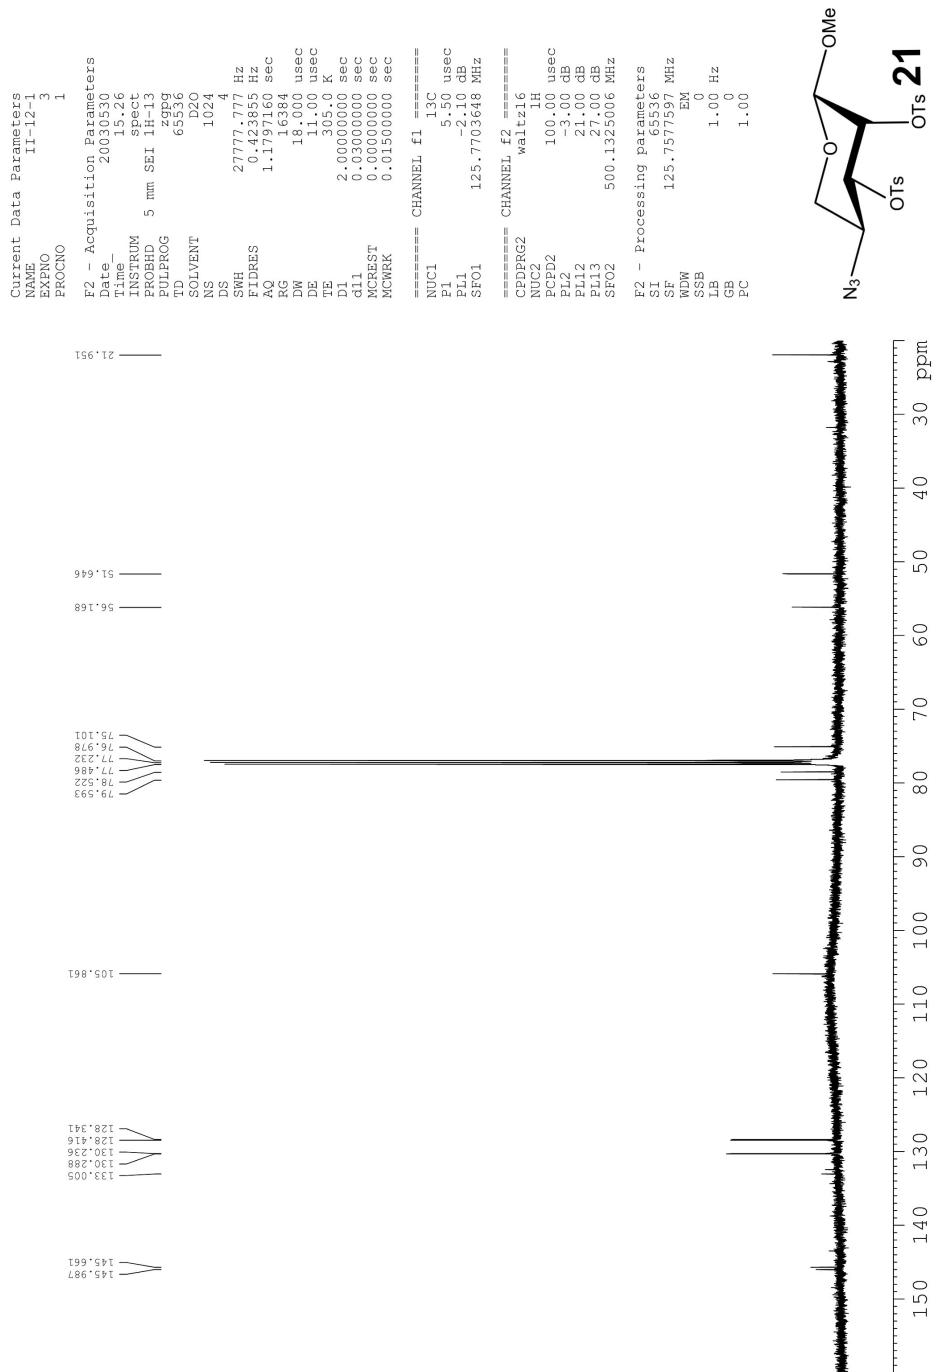

**Methyl 2,3-Bis-(*O*-4-toluenesulfonyl)- $\beta$ -L-lyxopyranoside (22).** A suspension of the tritosylate (**21**) (50 mg, 0.080 mmol) and sodium nitrite (55 mg, 0.80 mmol) in dry DMF (5 ml) was heated at 130 °C for 48 h. The cooled mixture was evaporated and the residue was extracted with EtOAc (25 ml). The organic extract was washed with 5% HCl (2x10 ml), saturated NaHCO<sub>3</sub> (2x10 ml) and brine (10 ml), then dried (MgSO<sub>4</sub>) and evaporated to a gum. This was triturated with hexane to give the ditosylate (**22**) as a colorless oil (30 mg, 81%).  $[\alpha]_D^{25}$  15.3 (*c* 0.2, CHCl<sub>3</sub>). *R*<sub>f</sub> (1:2:3 EtOAc/CHCl<sub>3</sub>/hexane): 0.15. ES-MS: 473 (MH)<sup>+</sup>, 490 (M+NH<sub>4</sub>)<sup>+</sup>, 495 (M+Na)<sup>+</sup>. <sup>1</sup>H NMR (500 MHz, CDCl<sub>3</sub>): 2.43 (s, 3H, Me); 2.45 (s, 3H, Me); 3.28 (br d, 1H, *J* = 12.2 Hz, H5a); 3.32 (s, 3H, OMe); 3.64 (dd, 1H, *J* = 2.3, 12.4 Hz, H5b); 4.19-4.21 (m, 1H, H4); 4.69 (d, 1H, *J* = 4.7 Hz, H1); 4.93-4.96 (m, 2H, H2,3); 7.31 (br d, 2H, *J* = 8.1 Hz, Ar-H); 7.35 (br d, 2H, *J* = 8.2 Hz, Ar-H); 7.70 (br d, 2H, *J* = 8.1 Hz, Ar-H); 7.80 (br d, 2H, *J* = 8.1 Hz, Ar-H); OH not observed. <sup>13</sup>C NMR (125 MHz, CDCl<sub>3</sub>) 21.8, 21.8, 56.1, 61.1, 74.5, 79.8, 81.0, 106.0, 128.2, 128.2, 130.1, 130.2, 132.5, 132.8, 145.5, 145.7. HRMS (TOF) calcd for C<sub>20</sub>H<sub>25</sub>O<sub>9</sub>S<sub>2</sub> (M+H)<sup>+</sup> 473.0940, found 473.0900.

```

Current Data Parameters
NAME      II-103-1
EXPNO     1
PROCNO    1

F2 - Acquisition Parameters
Date_     20031014
Time      13:24
INSTRUM   spect
PROBHD    5 mm SEI 1H-13
PULPROG   zg
TD         49152
SOLVENT   D2O
NS         8
DS         2
SWH        6009.615 Hz
FIDRES     0.122266 Hz
AQ         4.0895796 sec
RG         450
DA         83.200 usec
DE         11.00 usec
TE         303.0 K
D1         2.00000000 sec
MCREST    0.00000000 sec
MCWRK     0.01500000 sec

===== CHANNEL f1 =====
NUC1       1H
P1         9.00 usec
PL1        0.00 dB
SFO1       500.1325006 MHz

F2 - Processing parameters
SI         32768
SF         500.1300223 MHz
WDW        no
SSB        0
LB         0.00 Hz
GB         0
PC         1.00

1D NMR plot parameters
CX         22.50 cm
CY         15.00 cm
F1P        7.900 ppm
F1         3951.403 Hz
F2P        2.020 ppm
F2         1102.09 Hz
PPMCM      0.95333 ppm/cm
HZCM       126.69961 Hz/cm

```

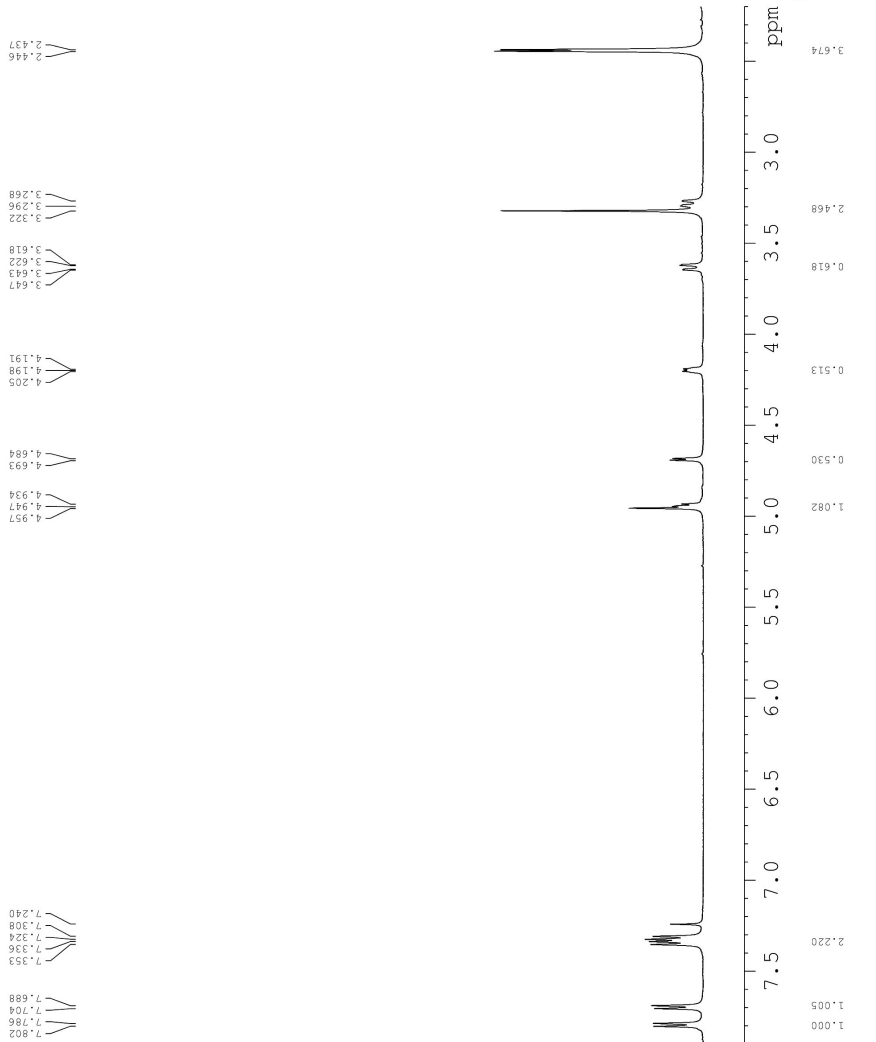

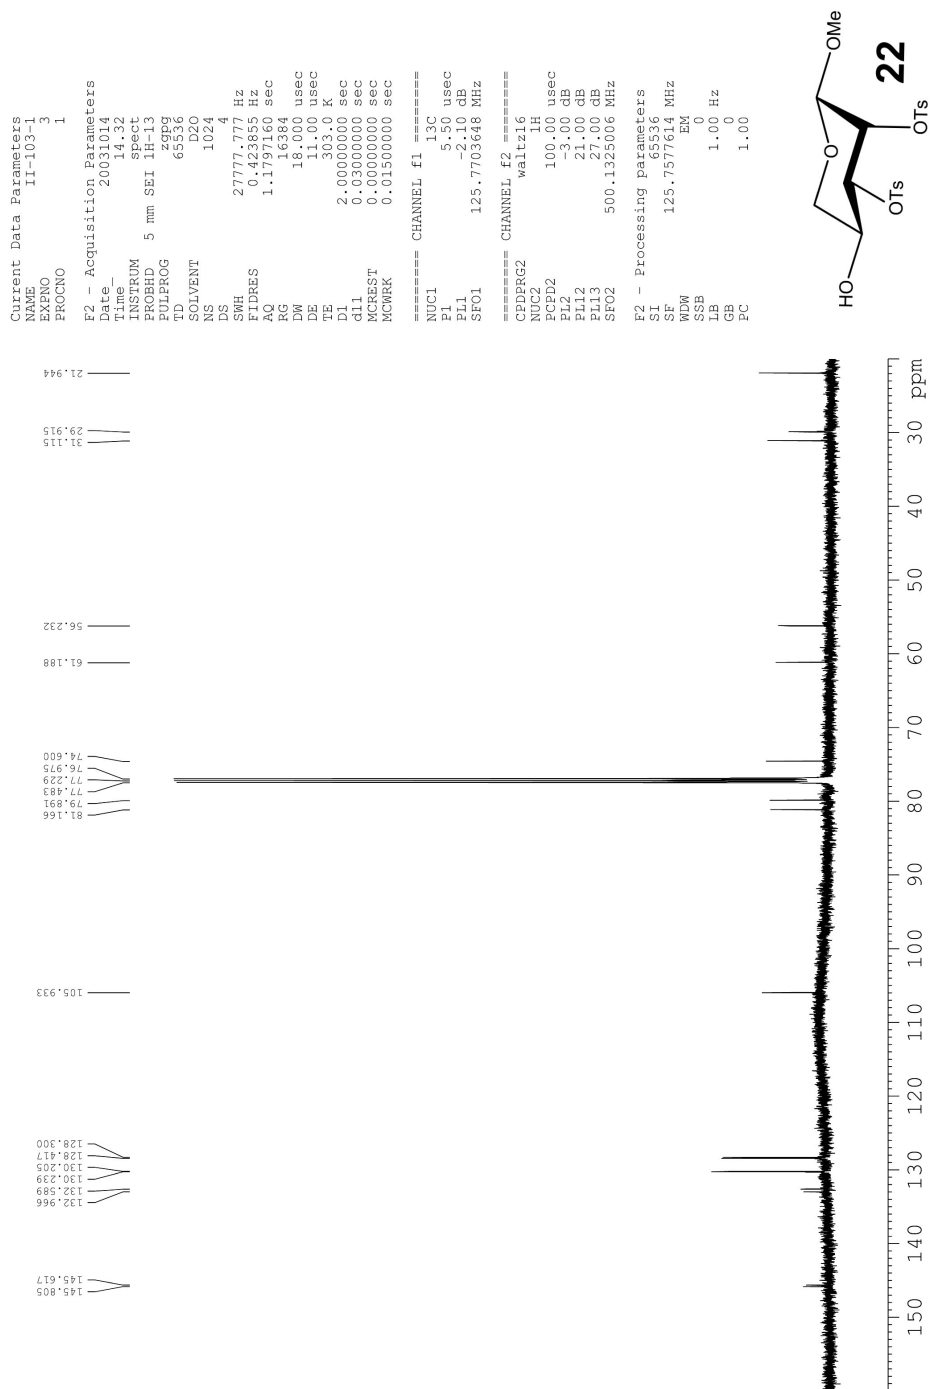

**Methyl  $\alpha$ -D-Lyxopyranoside (24).** Acetyl chloride (1.0 ml, 14 mmol) was added dropwise to a stirred solution of D-lyxose (**23**) (1.00 g, 6.6 mmol) in dry MeOH (50 ml). The solution was heated overnight at 50 °C, and then cooled in ice. The solution was then neutralized by the addition of solid Ag<sub>2</sub>CO<sub>3</sub>. Stirring was continued for 2 h at this temperature, then the mixture was filtered through Celite® and the filtrate evaporated to give the methyl pyranoside (**24**) as a syrup, in quantitative yield. The crude product was used directly for subsequent steps. Crystals slowly formed on standing, m.p. 91-93 °C (lit. m.p.<sup>6</sup> 102-103 °C; lit. m.p.<sup>9</sup> 108-109 °C). *R<sub>f</sub>* (3:2:1 CHCl<sub>3</sub>/EtOAc/MeOH): 0.23.

A small sample of the crude syrup was acetylated with Ac<sub>2</sub>O/pyridine gave the triacetate derivative, which was shown by <sup>1</sup>H NMR spectroscopy to be an 87:13 mixture of the  $\alpha/\beta$  anomers. <sup>1</sup>H NMR (500 MHz, CDCl<sub>3</sub>): ( $\alpha$ -anomer) 1.98 (s, 3H, OAc); 2.01 (s, 3H, OAc); 2.09 (s, 3H, OAc); 3.37 (s 3H, OMe); 3.58 (dd, 1H, *J* = 9.3, 11.0 Hz, H5); 3.85 (dd, 1H, *J* = 5.4, 11.0 Hz, H5); 4.61 (d, 1H, *J* = 2.4 Hz, H1); 5.17 (dd, 1H, *J* = 5.4, 9.7 Hz, H4); 5.19 (dd, 1H, *J* = 2.5, 3.4 Hz, H2); 5.31 (dd, 1H, *J* = 3.5, 10.3 Hz, H3).

**Methyl 2,3,4-Tris-(*O*-4-toluenesulfonyl)- $\alpha$ -D-lyxopyranoside (25).** A stirred, chilled (0 °C ) solution of the crude methyl  $\alpha$ -D-lyxopyranoside (**24**) (5.00 g, 30.5 mmol) in pyridine (50 ml) was treated portionwise during 30 min with 4-toluenesulfonyl chloride (40.0 g, 210 mmol). After stirring for 5 days at room temperature, the mixture was sonicated in a cleaning bath for 3 h, and then poured onto 100 g ice. After the ice had melted, the mixture was extracted into EtOAc (200 ml) and washed with 5% HCl (2x100 ml), saturated NaHCO<sub>3</sub> (2x100 ml) and brine (100 ml), then dried (MgSO<sub>4</sub>) and

evaporated to a syrup. This was triturated with hexane, and then the residue was purified by column chromatography (eluent: EtOAc/CHCl<sub>3</sub>/hexane 1:2:3) to give the tritosylated lyxose (**25**) (10.9 g, 57%), which was shown by <sup>1</sup>H NMR spectroscopy to be contaminated with 7% of the β-anomer. Two recrystallizations from EtOAc/hexane gave the pure tritosylate (**25**) as colorless crystals, m.p. 66-68 °C. [α]<sub>D</sub> 7.2 (*c* 1.0, CHCl<sub>3</sub>). ES-MS: 627 (MH)<sup>+</sup>, 644 (M+NH<sub>4</sub>)<sup>+</sup>, 649 (M+Na)<sup>+</sup>. <sup>1</sup>H NMR (500 MHz, CDCl<sub>3</sub>): 2.41 (s, 3H, Me); 2.42 (s, 3H, Me); 2.44 (s, 3H, Me); 3.28 (s, 3H, OMe); 3.45-3.54 (m, 1H, H5a); 3.74 (dd, 1H, *J* = 4.6, 11.3 Hz, H5b); 4.62 (dd, 1H, *J* = 3.1, 9.0 Hz, H3); 4.63-4.74 (m, 3H, H1,2,4); 7.26 (br d, 2H, *J* = 8.1 Hz, Ar-H); 7.31 (br d, 2H, *J* = 8.0 Hz, Ar-H); 7.34 (br d, 2H, *J* = 8.2 Hz, Ar-H); 7.58 (br d, 2H, *J* = 8.2 Hz, Ar-H); 7.68 (br d, 2H, *J* = 8.0 Hz, Ar-H); 7.75 (br d, 2H, *J* = 8.0 Hz, Ar-H). <sup>13</sup>C NMR (125 Hz, CDCl<sub>3</sub>) 22.4, 56.4, 61.1, 72.9, 74.2, 76.9, 99.0, 128.8, 128.9, 129.0, 130.5, 130.6, 130.7, 132.8, 133.3, 133.6, 146.0, 146.5. HRMS (TOF) calcd for C<sub>27</sub>H<sub>31</sub>O<sub>11</sub>S<sub>3</sub> (M+H)<sup>+</sup> 627.1029, found 627.1073.



Current Data Parameters  
NAME 114-cc-frc2-crystd  
EXPNO 1  
PROCNO 1

F2 - Acquisition Parameters  
Date\_ 20030528  
Time 18.10  
INSTRUM spect  
PROBHD 5 mm SEI 1H-13  
PULPROG zgpg30  
TD 49152  
SOLVENT CDCl3  
NS 8  
DS 2

SWH 6009.615 Hz  
FIDRES 0.122266 Hz  
AQ 4.0895796 sec  
RG 90.5  
DW 83.200 usec  
DE 11.00 usec  
TE 294.1 K  
D1 2.0000000 sec  
ACREST 0.0000000 sec  
MCWK 0.0150000 sec

===== CHANNEL f1 =====  
NUC1 1H  
P1 9.00 usec  
PL1 0.00 dB  
SFO1 500.1325006 MHz

F2 - Processing parameters  
SI 65536  
SF 500.1300334 MHz  
WDW no  
SSB 0  
GB 0.00 Hz  
CB 0.00 Hz  
PC 1.00

1D NMR plot parameters  
CX 22.50 cm  
CY 15.00 cm  
FLP 8.000 ppm  
F1 4001.04 Hz  
F2P 2.000 ppm  
F2 1000.26 Hz  
PFMCM 0.26667 ppm/cr  
HZ/CW 133.36801 Hz/cm

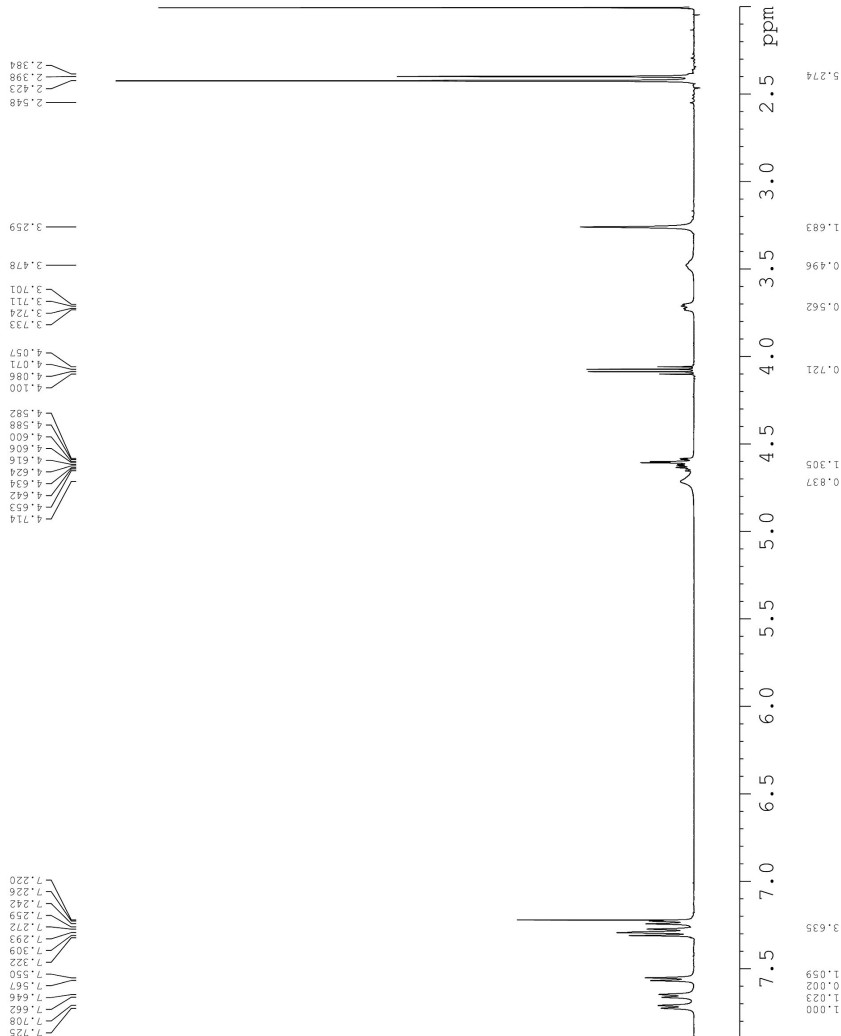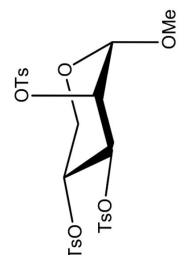

25

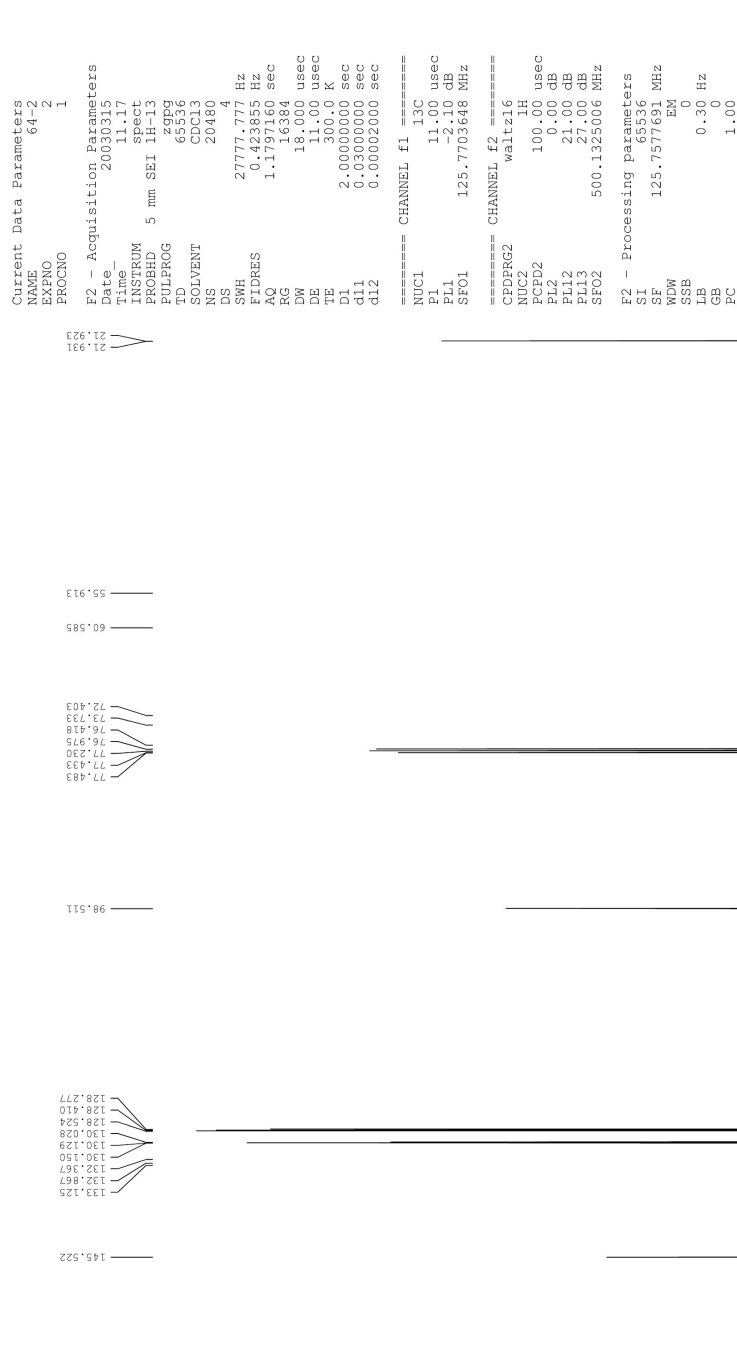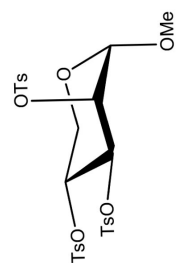

25

**3*R*,6*S*-3-Benzoyloxy-6-methoxy-4-(4-toluene sulfonyloxy)-3,6-dihydro-2*H*-pyran (26).**

A mixture of the pure tritosylated lyxose (**25**) (80 mg, 0.13 mmol) and sodium benzoate (250 mg, 1.74 mmol) in DMF (20 ml) was heated at 130 °C for 5 days. The cooled mixture was evaporated then the residue was extracted into EtOAc (50 ml) and filtered. The filtrate was washed with 5% HCl (2x50 ml), saturated NaHCO<sub>3</sub> (2x50 ml) and brine (50 ml), then dried (MgSO<sub>4</sub>) and evaporated. The residue was purified by flash chromatography to give the dihydropyran (**26**) as a colorless oil (15 mg, 29%). [ $\alpha$ ]<sub>D</sub> 10.3 (*c* 1.2, CHCl<sub>3</sub>). ES-MS: 405 (MH)<sup>+</sup>, 422 (M+NH<sub>4</sub>)<sup>+</sup>, 427 (M+Na)<sup>+</sup>. <sup>1</sup>H NMR (500 MHz, CDCl<sub>3</sub>): (carbohydrate numbering) 2.32 (s, 3H, Me); 3.40 (s, 3H, OMe); 3.87 (dd, 1H, *J* = 1.1, 13.2 Hz, H5a); 4.16 (dd, 1H, *J* = 2.7, 13.2 Hz, H5b); 5.10 (d, 1H, *J* = 3.5 Hz, H1); 5.22 (dd, 1H, *J* = 1.0, 2.7 Hz, H4); 6.01 (d, 1H, *J* = 3.5 Hz, H2); 7.19 (br d, 2H, *J* = 8.6 Hz, Ar-H); 7.41 (br t, 2H, *J* = 7.8 Hz, Ar-H); 7.55 (br t, 1H, *J* = 7.1 Hz, Ar-H); 7.71 (br d, 2H, *J* = 8.6 Hz, Ar-H); 7.92 (br d, 2H, *J* = 8.4, Ar-H). <sup>13</sup>C NMR (125 Hz, CDCl<sub>3</sub>) 22.7, 57.0, 63.3, 66.3, 96.2, 129.3, 129.4, 130.4, 130.8, 131.0, 134.0, 134.4, 138.0, 146.3, 146.5, 166.7. HRMS (TOF) calcd for C<sub>20</sub>H<sub>20</sub>O<sub>7</sub>SNa (M+Na)<sup>+</sup> 427.0827, found 427.0813.

Current Data Parameters  
NAME 111-cc-irc3  
EXPNO 1  
PROCNO 1

F2 - Acquisition Parameters  
Date\_ 20030421  
Time 11.53  
INSTRUM spect  
PROBHD 5 mm SEI 1H-13  
PULPROG zg  
TD 49152  
SOLVENT CDCl3  
NS 8  
DS 2  
SWH 6009.615 Hz  
FIDRES 0.122266 Hz  
AQ 4.0895796 sec  
RG 327.9  
DM 83.200 usec  
DE 11.00 usec  
TE 300.0 K  
D1 2.00000000 sec

===== CHANNEL f1 =====  
NUC1 1H  
P1 9.00 usec  
PL1 0.00 dB  
SFO1 500.1325006 MHz

F2 - Processing parameters  
SI 6536  
SF 500.1300231 MHz  
WDW no  
SSB no  
LB 0.00 Hz  
GB 0  
PC 1.00

1D NMR plot parameters  
CX 22.50 cm  
CY 138.80 cm  
FIP 8.500 ppm  
F1 4251.11 Hz  
F2 2.000 ppm  
FZ 1000.26 Hz  
HPCMC 0.428889 ppm/cm  
HZCM 144.48201 Hz/cm

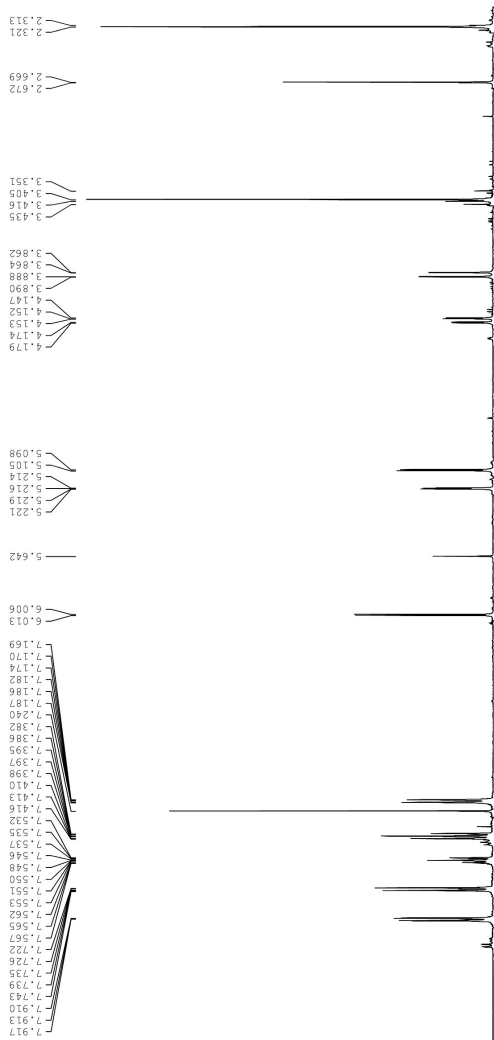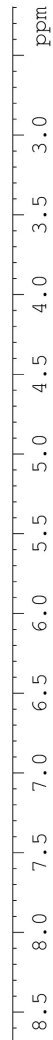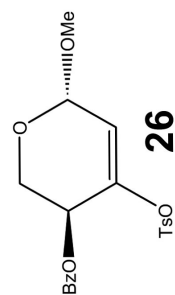

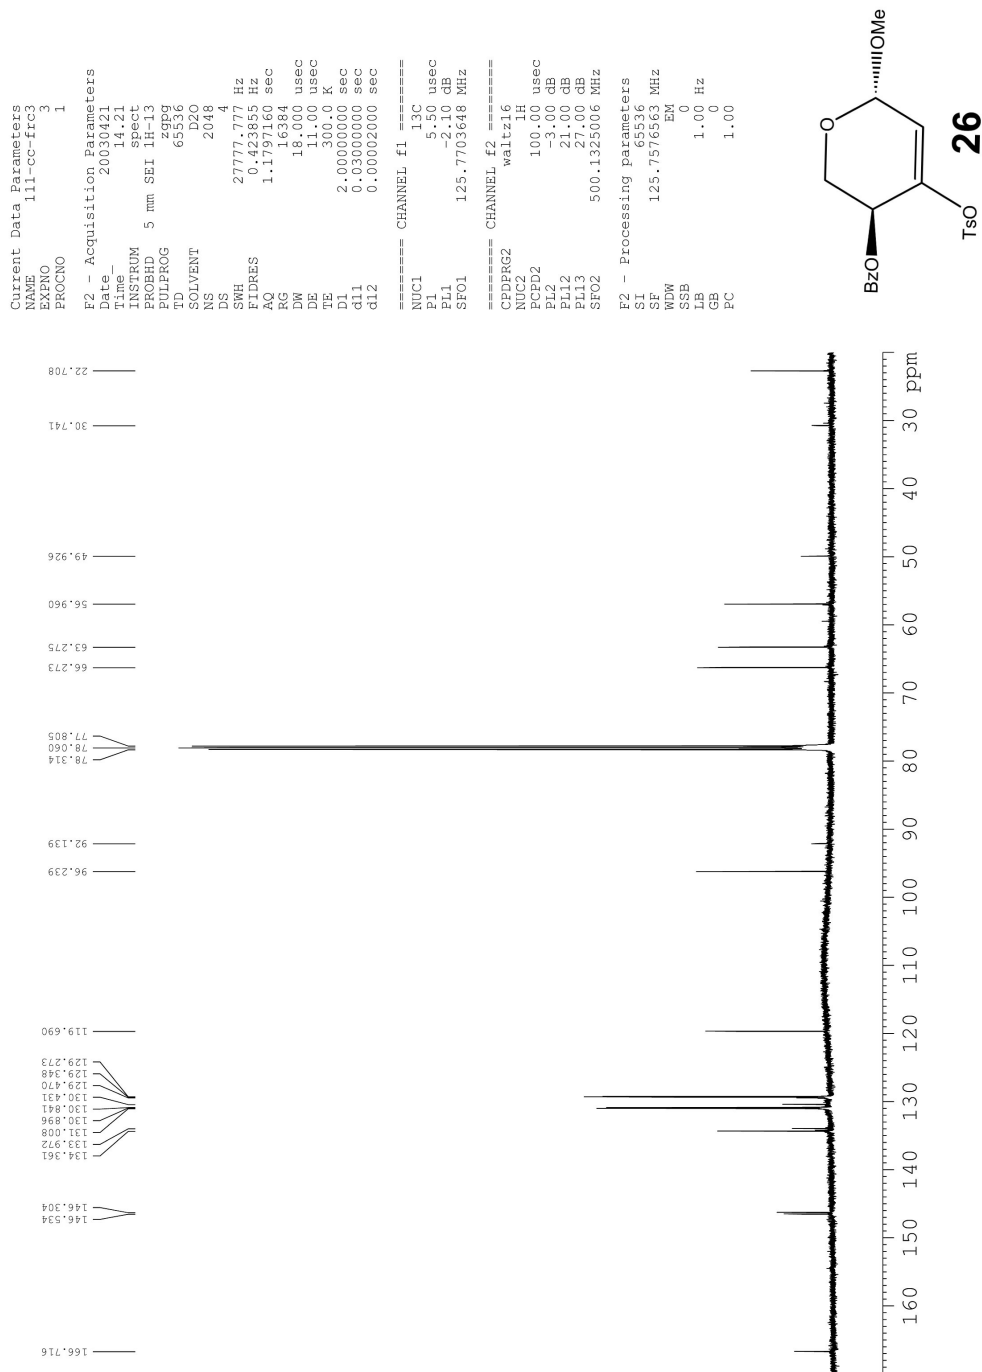

## References:

- (1) Indurugalla, D.; Bennet, A. J. *Journal of the American Chemical Society* **2001**, *123*, 10889-10898.
- (2) McEwan, T.; McInnes, A. G.; Smith, D. G. *Carbohydrate Research* **1982**, *104*, 161-8.
- (3) Jones, J. K. N.; Thompson, J. L. *Canadian Journal of Chemistry* **1957**, *35*, 955-9.
- (4) Kondo, Y. *Carbohydrate Research* **1982**, *110*, 339-44.
- (5) Dick, A. J.; Jones, J. K. N. *Canadian Journal of Chemistry* **1966**, *44*, 79-87.
- (6) Buchanan, J. G.; Edgar, A. R. *Carbohydrate Research* **1976**, *49*, 289-304.
- (7) Reeves, R. E. *Journal of the American Chemical Society* **1949**, *71*, 1737-9.
- (8) Kondo, Y. *Carbohydrate Research* **1987**, *162*, 159-65.
- (9) Kent, P. W.; Ward, P. F. V. *Journal of the Chemical Society, Abstracts* **1953**, 416-18.
